# 1 **Neural basis of opioid-induced respiratory depression and its rescue.**

2 Shijia Liu<sup>1,2</sup>, Dongil Kim<sup>1</sup>, Tae Gyu Oh<sup>3</sup>, Gerald Pao<sup>4</sup>, Jonghyun Kim<sup>1</sup>, Richard D. Palmiter<sup>5</sup>, Matthew R. Banghart<sup>2</sup>,  
3 Kuo-Fen Lee<sup>1,2</sup>, Ronald M. Evans<sup>3</sup>, Sung Han<sup>1,2,\*</sup>

4 <sup>1</sup>Peptide Biology Laboratories, The Salk Institute for Biological Studies, La Jolla, CA 92037, USA.

5 <sup>2</sup>Section of Neurobiology, Division of Biological Sciences, University of California, San Diego, La Jolla, CA  
6 92093, USA.

7 <sup>3</sup>Howard Hughes Medical Institute, Gene Expression Laboratories, The Salk Institute for Biological Studies, La  
8 Jolla, CA 92037, USA.

9 <sup>4</sup>Molecular and Cellular Biology Laboratories, The Salk Institute for Biological Studies, La Jolla, CA 92037, USA.

10 <sup>5</sup>Howard Hughes Medical Institute, Department of Biochemistry, School of Medicine, University of Washington,  
11 Seattle, WA 98195, USA.

12 \*Corresponding author: Sung Han, PhD

13 **Author Contributions:** S.H. conceived the idea, designed and constructed respiratory monitoring apparatus, and  
14 secured funding. S.H. and S.L. designed the experiments and wrote the manuscript with inputs from other authors.  
15 S.L. performed most of the experiments. D.K. and J.K. prepared the sample for RiboTag RNA sequencing. T.G.O.  
16 analyzed the data from RiboTag RNA sequencing. G.M.P. performed the CCM analysis. R.D.P. provided the  
17 Oprm1<sup>Cre</sup> mouse line. M.R.B. provided the hMOR virus. K.F.L. and R.M.E. provided experimental resources.

## 18 **Acknowledgments**

19 We thank the Han lab members for the critical discussion of the paper and D. O’Keefe and M. Shields for critical  
20 inputs on the manuscript. S.H. is supported by 1R01MH116203 from NIMH, the Bridge to Independence award  
21 from the Simons Foundation Autism Research Initiative (SFARI #388708), and Brain Research Foundation  
22 Fay/Frank Seed Grant. K.F.L. is supported by MH114831, OD023076, AG062232, NS115183 and AG064049.

23 **Competing Interest Statement:** The authors have declared no conflict of interest.

24

25

26

27

## 28 **Abstract**

29 Opioid-induced respiratory depression (OIRD) causes death following an opioid overdose, yet the neurobiological  
30 mechanisms of this process are not well understood. Here, we show that neurons within the lateral parabrachial  
31 nucleus that express the  $\mu$ -opioid receptor (PBL<sup>*Oprm1*</sup> neurons) are involved in OIRD pathogenesis. PBL<sup>*Oprm1*</sup>  
32 neuronal activity is tightly correlated with respiratory rate, and this correlation is abolished following morphine  
33 injection. Chemogenetic inactivation of PBL<sup>*Oprm1*</sup> neurons mimics OIRD in mice, whereas their chemogenetic  
34 activation following morphine injection rescues respiratory rhythms to baseline levels. We identified several  
35 excitatory G-protein coupled receptors expressed by PBL<sup>*Oprm1*</sup> neurons and show that agonists for these receptors  
36 restore breathing rates in mice experiencing OIRD. Thus, PBL<sup>*Oprm1*</sup> neurons are critical for OIRD pathogenesis,  
37 providing a promising therapeutic target for treating OIRD in patients.

38

## 39 **Introduction**

40 The misuse of prescription and recreational opioids has taken nearly 4.5 million lives between 1999 and 2018 in  
41 the United States alone (1). The direct cause of death from opioid overdose is opioid-induced respiratory depression  
42 (OIRD) (2, 3). Currently, the only available antidote capable of reversing OIRD is naloxone, a nonselective opioid  
43 receptor antagonist. However, naloxone is associated with several disadvantages, namely the reappearance of OIRD  
44 due to its short half-life, the inability to reverse high-affinity opioid drugs (e.g., carfentanil and buprenorphine) due  
45 to its low binding affinity, and the potential to induce a catecholamine surge at high doses, which can cause  
46 cardiopulmonary arrest (4-6). Alternative non-opioid interventions include respiratory stimulants that act on the  
47 brainstem respiratory network (e.g., ampakines) or oxygen-sensing cells within the carotid bodies (e.g., K<sup>+</sup>-channel  
48 blockers) (5). However, none of these alternatives are as effective as naloxone, and the safety of these interventions  
49 has not been well documented. Therefore, novel treatment strategies are needed, and more effective  
50 countermeasures can only be developed with a mechanistic understanding of OIRD pathogenesis.

51 Neural substrates that contribute to OIRD pathogenesis should satisfy two criteria. They should localize to  
52 the breathing control network and express the  $\mu$ -opioid receptor (MOR, encoded by the *Oprm1* gene), which has  
53 been demonstrated as the primary mediator of both the analgesic and respiratory effects of opioids (7, 8). Two  
54 candidate structures satisfy these criteria, namely the pre-Bötzinger complex (preBötC) and the parabrachial  
55 complex (9-17). The former lies in the ventrolateral medulla and is the primary generator of the respiratory rhythm  
56 (18-20). The parabrachial complex, including the lateral parabrachial, medial parabrachial, and Kölliker-Fuse (KF)  
57 nuclei, is located in the dorsolateral pons and modulates breathing (21-23), in response to homeostatic disturbances

58 such as CO<sub>2</sub>/O<sub>2</sub> imbalance and noxious stimuli (24-28). Recent studies have suggested the involvement of these  
59 two brain regions on OIRD pathogenesis by using either pharmacological or genetic approaches. Direct infusion of  
60 opioid agonists or antagonists into these brain areas induces or attenuates OIRD (9, 12, 29, 30). Region-specific  
61 genetic deletion of the *Oprm1* genes by viral delivery of Cre-recombinase into these areas of the *Oprm1*-floxed  
62 mice also attenuates OIRD (13, 14). However, the pharmacological approach lacks considerable specificity  
63 primarily due to the local diffusion of drugs and the difficulty of reproducible targeting, whereas the genetic deletion  
64 approach is often incomplete and prevents the possibility to directly control the neuronal activity in a spatially and  
65 temporally precise manner. As a result, discrepancies arise over the critical site of action responsible for OIRD (13,  
66 14, 16, 17). To expand the scope of current research, our paper utilizes contemporary cell-type-specific approaches  
67 to characterize the role of a defined neuronal population in morphine-induced respiratory depression. This will  
68 allow us to better understand its cellular and physiological mechanisms and make inroads in developing therapeutic  
69 strategies.

70 Here we report that a genetically defined population of neurons that encodes the *Oprm1* gene in the lateral  
71 parabrachial nucleus (PBL<sup>*Oprm1*</sup> neurons) is an important regulator of respiratory rhythm. Inhibition of these neurons  
72 by opioids leads to respiratory depression. Furthermore, we show that both chemogenetic activation of these neurons  
73 and pharmacological activation of endogenous G-protein coupled receptors (GPCRs) expressed specifically in these  
74 neurons completely rescues OIRD in mice.

75

## 76 Results

77 To examine the contributions of global MOR signaling to OIRD, we generated an *Oprm1* reporter mouse  
78 line in which the endogenous *Oprm1* gene was knocked out by inserting a Cre:GFP cassette upstream of the start  
79 codon (*Oprm1<sup>Cre</sup>*) (Figure 1B and Supplementary Figure 1A for validation), and measured the effects of systemic  
80 morphine injection on breathing rhythms via whole-body plethysmography (Figure 1A). After receiving a morphine  
81 injection, wild-type mice exhibited a significantly lower respiratory rate ( $46.5 \pm 3.1\%$  of the pre-morphine baseline  
82 (data are represented as mean  $\pm$  SEM throughout the paper)). In contrast, mice lacking one or both functional copies  
83 of the *Oprm1* gene (*Oprm1<sup>Cre/+</sup>* and *Oprm1<sup>Cre/Cre</sup>*) exhibited more moderate reductions in respiratory rate ( $63.2 \pm$   
84  $2.8\%$  and  $91.2 \pm 2.8\%$  of the pre-morphine baseline, respectively) (Figure 1C, D). *Oprm1*, therefore, plays a vital  
85 role in OIRD.

86 We then used pharmacological and genetic tools to manipulate opioid signaling specifically in the PBL.  
87 First, wild-type mice received a systemic injection of morphine followed by an infusion of naloxone directly into  
88 the PBL (Figure 1E). To facilitate stereotaxic naloxone delivery, we lightly anesthetized mice with 1-1.5%  
89 isoflurane and monitored their breathing using a piezoelectric sensor that detects chest movements (31). After  
90 systemic injection of morphine, the breathing rate dramatically decreased from  $121.0 \pm 3.4$  bpm to  $89.1 \pm 3.5$  bpm,  
91 and subsequent stereotaxic injection of naloxone into the PBL recovered the breathing rate back to pre-morphine  
92 baseline ( $120.8 \pm 3.7$  bpm) (Figure 1F, G). We then explored whether the expression of the *Oprm1* gene in the PBL  
93 is necessary and sufficient for OIRD. To assess necessity, we conditionally knocked out the *Oprm1* gene using  
94 stereotaxic delivery of a recombinant adeno-associated virus (AAV) expressing Cre recombinase into the PBL  
95 of the *Oprm1<sup>fl/fl</sup>* mice, in which the *Oprm1* gene is flanked by loxP sites (Figure 1H). Compared to mice receiving  
96 GFP-expressing control virus, PBL-specific knockout of the *Oprm1* gene attenuated OIRD following systemic  
97 injection of morphine, as measured by whole-body plethysmography (breathing rate changes in GFP group:  $-136.6$   
98  $\pm 21.1$  bpm; Cre group:  $-76.4 \pm 11.6$  bpm) (Figure 1I and Supplementary Figure 2A-C). To test sufficiency, we  
99 reintroduced the wild-type *Oprm1* gene into the PBL<sup>*Oprm1*</sup> neurons of Cre-expressing *Oprm1*-null mice. This was  
100 achieved by injecting an AAV expressing Cre-dependent human MOR (AAV-hSyn-DIO-mCherry-T2A-FLAG-  
101 hMOR) (Figure 1J) into the PBL of *Oprm1<sup>Cre/Cre</sup>* mice. Selective expression of hMOR in the PBL restored the OIRD  
102 phenotype (hMOR group, post-saline:  $359.0 \pm 5.1$  bpm; post-morphine:  $299.0 \pm 3.6$  bpm) compared to the  
103 control group (Figure 1K and Supplementary Figure 2D). Note that the breathing rate measured by the piezoelectric  
104 sensor under anesthesia (Figure 1G) is ~3-fold lower than that measured in a plethysmography chamber (Figure  
105 1K). Together, these data strongly support the conclusion that the *Oprm1* gene expression in the PBL mediates  
106 OIRD in mice.

107 We then focused on PBL<sup>Oprm1</sup> neurons and explored their relationship with OIRD. PBL<sup>Oprm1</sup> neurons are  
108 mostly glutamatergic and express higher levels of the *Oprm1* gene than the adjacent KF nucleus, which provides  
109 post-inspiratory drive (13, 23, 31, 32) (Supplementary Figure 1B-C). We devised an experimental platform to  
110 simultaneously measure PBL<sup>Oprm1</sup> neuronal activity and respiration in awake, freely moving mice using fiber-  
111 photometry calcium imaging *in vivo* with a thermistor implanted into the nasal cavity (Figure 2A). The thermistor-  
112 based respiration monitoring device detects the temperature change between inhaled and exhaled air and converts  
113 breath-to-breath fluctuations in resistance into voltage signals (33). We stereotaxically injected an AAV expressing  
114 Cre-dependent jGCaMP7s (AAV-DIO-jGCaMP7s) into the PBL, then implanted an optic fiber into the PBL of  
115 *Oprm1*<sup>Cre/+</sup> mice and a respiration sensor in the nasal cavity (Figure 2B). PBL<sup>Oprm1</sup> activity and breathing rate  
116 exhibited a tight positive correlation (Figure 2C-D, H). Moreover, morphine administration substantially decreased  
117 the breathing rate ( $46.5 \pm 3.9\%$  of the pre-morphine baseline) (Figure 2H, J, L, and N) despite the potent effect  
118 morphine has on locomotor sensitization (Supplementary Figure 3), which one would expect to elevate the breathing  
119 rate. Besides, morphine decreased calcium activity (Figure 2H, J, O, and Q), as well as eliminated any spontaneous  
120 fluctuations in both breathing and calcium signals (Figure 2N, Q). In contrast, saline injection largely preserved the  
121 original patterns of the signals (Figure 2D, 2F, 2L-M, and 2O-P). Using convergent cross-mapping (CCM) (34), a  
122 statistical algorithm that makes predictions from independent time-series data, we predicted changes in respiratory  
123 rate using the calcium signal as input ( $76.2 \pm 8.1\%$ , pre-morphine predictability) (Supplementary Figure 4).  
124 Interestingly, systemic morphine administration not only reduced the correlation coefficient (Figure 2I, K) but also  
125 completely abolished the predictive relationship between respiratory rate and the calcium signal ( $12.5 \pm 20.2\%$ ,  
126 post-morphine predictability) (Supplementary Figure 4C-D). Conversely, the saline injection did not alter the  
127 correlation between these signals (Fig 2E, G, and Supplementary Figure 4A-B). These results indicate that PBL<sup>Oprm1</sup>  
128 neurons are critically involved in modulating respiratory rate and that morphine suppresses both the PBL<sup>Oprm1</sup>  
129 neuronal activity and its coupling with the breathing rate.

130 To further investigate PBL<sup>Oprm1</sup> neurons' role in breathing regulation, we specifically manipulated their  
131 activity using chemogenetic tools, namely Designer Receptor Exclusively Activated by Designer Drugs  
132 (DREADD) (35). If PBL<sup>Oprm1</sup> neurons directly regulate breathing, inhibiting their activity via a G<sub>i/o</sub>-coupled  
133 DREADD should recapitulate the OIRD phenotype. Furthermore, this should also happen in *Oprm1* knockout mice,  
134 which failed to display OIRD when given systemic morphine (Figure 1C-D). We expressed a  $\kappa$ -opioid receptor-  
135 derived DREADD (KORD) (36) Cre-dependently and bilaterally in PBL<sup>Oprm1</sup> neurons of *Oprm1*<sup>Cre/Cre</sup> mice (Figure  
136 3A). Systemic injection of its synthetic ligand, salvinorin B (SALB), decreased the respiratory rate ( $317.8 \pm 3.6$   
137 bpm) compared to the DMSO-injected control group ( $342.4 \pm 4.1$  bpm) (Figure 3B and Supplementary Figure 5A-  
138 B). We did not observe significant breathing amplitude changes upon SALB injection in either control or KORD-  
139 expressing animals (Supplementary Figure 5B-C).

140 We next asked whether artificial activation of PBL<sup>Oprm1</sup> neurons could prevent OIRD in mice. We expressed  
141 hM3Dq, a metabotropic acetylcholine receptor-derived excitatory DREADD, in PBL<sup>Oprm1</sup> neurons via bilateral  
142 injection of an AAV encoding Cre-dependent hM3Dq into *Oprm1*<sup>Cre/+</sup> mice (Figure 3C). Additionally, we implanted  
143 a micro-thermistor sensor into the nasal cavity to monitor respiratory rhythm in awake, freely moving mice over  
144 the course of OIRD (Supplementary Figure 5D). Upon systemic morphine injection, the respiratory rate decreased  
145 significantly within 10 min (from 332.0 ± 25.6 bpm to 124.6 ± 9.1 bpm) (Figure 3D-E). We then systemically  
146 injected the hM3Dq agonist, clozapine-N-oxide (CNO), into the same animal to activate PBL<sup>Oprm1</sup> neurons. CNO  
147 injection increased the breathing rate in hM3Dq-expressing animals (268.0 ± 13.5 bpm) to a level comparable to  
148 controls that did not receive morphine (275.7 ± 24.9 bpm). Nevertheless, CNO did not rescue breathing rates in  
149 eYFP-expressing control animals (120.0 ± 4.3 bpm) (Figure 3D-F and Supplementary Figure 5E). A complete  
150 rescue was also observed in minute volume (Supplementary Figure 5F, G). These data show that activation of  
151 PBL<sup>Oprm1</sup> neurons is sufficient to restore normal breathing rhythms in mice displaying OIRD.

152 Having determined that chemogenetic activation of PBL<sup>Oprm1</sup> neurons could effectively prevent OIRD, we  
153 sought to identify endogenous signaling pathways that could be used to activate PBL<sup>Oprm1</sup> neurons. To identify the  
154 active transcriptome enriched in PBL<sup>Oprm1</sup> neurons, we sequenced ribosome-associated mRNAs from the PBL of  
155 *Oprm1*<sup>Cre::RiboTag</sup> mice, which express hemagglutinin (HA)-tagged ribosomal protein Rpl22 in *Oprm1*<sup>+</sup> neurons  
156 (Figure 4A-B) (37). We identified 69 mRNAs upregulated over three folds in PBL<sup>Oprm1</sup> neurons than non-*Oprm1*  
157 neurons in the PBL (Figure 4C). *Oprm1*, as well as other major parabrachial markers (*Tac1*, *Foxp2*, and *Adcyap1*)  
158 were enriched, but *Calca* and *Pdyn*, markers for the external lateral and dorsal lateral parabrachial nucleus, were  
159 not (38, 39). Notably, the PBL<sup>Oprm1</sup> active transcriptome revealed several GPCRs expressed at high levels in these  
160 neurons, which we subsequently investigated as potential pharmacological targets to rescue OIRD.

161 We selected five excitatory GPCRs for pharmacological manipulation and confirmed that they were  
162 expressed in PBL<sup>Oprm1</sup> neurons by RNA *in situ* hybridization (Supplementary Figure 6A-B). These GPCRs were 5-  
163 hydroxytryptamine receptor 2A (*Htr2a*), cholecystokinin A receptor (*Cckar*), tachykinin receptor 1 (*Tacr1*),  
164 tachykinin receptor 3 (*Tacr3*), and dopamine receptor D5 (*Drd5*). We systemically injected their agonists (TCB-2,  
165 CCK8S, Substance P, Senktide, and SKF83959, respectively) into the PBL of anesthetized mice after inducing  
166 OIRD (breathing rate before morphine: 115.4 ± 1.6 bpm, after morphine: 77.9 ± 2.3 bpm; Figure 4D-E and  
167 Supplementary Table 1). Three of the five agonists tested (TCB-2, CCK8S, and Substance P) increased the  
168 respiratory rate (98.1 ± 7.9, 117.1 ± 6.4, 100.8 ± 4.6 bpm; Figure 4F and Supplementary Figure 6C-E). Notably,  
169 these same drugs have been shown to modulate respiratory rhythm in different contexts by activating other  
170 respiratory centers, and some have been associated with an anti-morphine effect (40-42). Our findings suggest that  
171 activating PBL<sup>Oprm1</sup> neurons through endogenous signaling pathways may effectively treat OIRD in patients.

## 172 Discussion

173 We have identified a population of neurons in the pontine respiratory group, the PBL<sup>Oprm1</sup> neurons, as  
174 critical mediators of morphine-induced respiratory depression and candidates for its rescue in intact mice. Genetic  
175 deletion of *Oprm1* from the PBL attenuated OIRD, while reintroducing human MOR into the PBL<sup>Oprm1</sup> neurons  
176 restored OIRD. By combining cell-type-specific tools with breathing monitoring in awake behaving mice, we have  
177 demonstrated that PBL<sup>Oprm1</sup> neurons are regulators of the breathing rhythm and pattern. Systemic morphine  
178 administration dramatically abolishes the activity of these neurons and weakens their control on breathing.  
179 Furthermore, chemogenetic inhibition of PBL<sup>Oprm1</sup> neurons mimics OIRD, and prolonged optogenetic inhibition of  
180 PBL<sup>Oprm1</sup> neurons induces apnea (observations from our group (43)), which precedes cardiorespiratory collapse  
181 prior to overdose-induced death. By contrast, artificial activation of PBL<sup>Oprm1</sup> neurons, either chemogenetically or  
182 pharmacologically, successfully restores breathing in mice experiencing OIRD (Supplementary Figure 7).

### 183 Investigating OIRD with cell-type-specific approaches.

184 Recent studies have demonstrated the involvement of both pontine and medullary respiratory groups in  
185 OIRD (13, 14) without reaching a consensus on the key players. We think this is mostly due to the lack of specificity  
186 from the pharmacological and genetic deletion approaches and the intricacies of physiological preparations, both of  
187 which hampers reproducibility. In comparison, we exploited the *Oprm1*<sup>Cre</sup> mouse line which provides access to a  
188 restricted neuronal population, and obtained multi-faceted evidence supporting the role of the parabrachial nucleus  
189 in OIRD. In our view, OIRD is a synergistic outcome from impairment of the interconnected pontomedullary  
190 breathing network that widely expresses MOR both pre- and post-synaptically (10, 11, 30, 44, 45). For example,  
191 parabrachial neurons send tonic excitatory inputs to the preBötC (39, 43, 46, 47), and both of these areas express  
192 MOR (18, 48).

193 One challenge of elucidating the OIRD mechanism is how to access a group of neurons while  
194 simultaneously record breathing over the course of OIRD. Traditional respiratory monitoring approaches in rodents,  
195 such as *in situ* or *in vivo* anesthetized preparations and plethysmography chambers, are more challenging to achieve  
196 this goal. Therefore, we utilized the implantable temperature sensor to monitor breathing in awake, unrestrained,  
197 behaving mice with unprecedented freedom to access the brain due to its open configuration. With this approach,  
198 we implemented chemogenetics and *in vivo* calcium imaging while simultaneously monitored breathing rhythms.  
199 Similar techniques can be applied to the *Oprm1*-expressing neurons in the preBötC, KF, the postinspiratory complex  
200 (49), and other respiratory centers to resolve the long-standing debate on their contributions in OIRD (16, 17).

### 201 PBL<sup>Oprm1</sup> neurons' role in breathing regulation and OIRD.

202           The parabrachial complex has long been reported to modulate respiration and sometimes exert opposing  
203 effects depending on the location of artificial manipulation (21-23). Stimulation of the PBL results in tachypnea,  
204 whereas stimulation of the KF elicits prolonged post-inspiration and bradypnea (13, 31, 32). Consistent with these  
205 previous reports, our monitoring and manipulation data suggest that PBL<sup>*Oprm1*</sup> neurons have the most substantial  
206 effect on the breathing rate (23). In addition to breathing, the PBL also regulates various homeostatic functions (39)  
207 and incorporates the alarm center, which senses deviations from the homeostasis and relays aversive signals to  
208 higher-order brain structures (38, 50). At the same time, by sending tonic excitatory outputs to medulla respiratory  
209 centers (39, 43, 46), the parabrachial neurons can increase breathing rhythm under conditions that immediately  
210 require more oxygen due to metabolic needs, such as hypoxia (27) and hypercapnia (26), in particular, hypercapnic  
211 arousal during sleep (24, 28, 51); or non-metabolic behavioral demands, such as escaping from a threat (25). As a  
212 representative glutamatergic population in the PBL (Supplementary Figure 1), *Oprm1*-positive neurons are likely  
213 to participate in similar physiological processes. Our data demonstrated that an overdose of morphine shuts down  
214 PBL<sup>*Oprm1*</sup> neurons' activity, preventing them from responding to conditions that decrease respiratory rhythm. These  
215 conditions may include hypoxia, hypercapnia, anesthesia, or sedative drug treatment. Indeed, the incidence of OIRD  
216 is dramatically increased when opioids are used together with sedatives and anesthetics (52), and the failure to  
217 increase respiratory behavior in response to hypercapnic gas is one characteristic of OIRD (3). On the contrary, a  
218 mild inhibition of PBL<sup>*Oprm1*</sup> neurons may explain many of the behavioral effects of lower doses of endogenous or  
219 exogenous opioids, such as slowed breathing, calmness, and reward (43). The current study used morphine as a  
220 starting point to induce OIRD, and further investigation is required to determine the involvement of PBL<sup>*Oprm1*</sup>  
221 neurons under the challenge of other types of sedative agents.

## 222 **A proof of principle of rescuing OIRD by activating a pontine population.**

223           PBL<sup>*Oprm1*</sup> neurons are among the key nodes most vulnerable to opioid action, and their activation is  
224 sufficient to restore the breathing rate and tidal volume following morphine administration. This activation can be  
225 achieved by exploiting both artificial and, more importantly, endogenous signaling pathways. Besides, manipulating  
226 PBL<sup>*Oprm1*</sup> neurons located in the dorsolateral pons is associated with lower risk than the respiratory  
227 rhythm generators within the deep medulla. We have provided a proof of concept of rescuing OIRD by activating  
228 endogenous G<sub>q/s</sub>-coupled GPCRs expressed in PBL<sup>*Oprm1*</sup> neurons (Supplementary Figure 7). In principle, cell-type-  
229 specific manipulation can also be achieved through the collective activation of multiple GPCRs.

230           Our transcriptomic profiling data suggested that other neuromodulators, such as serotonin, cholecystinin,  
231 and tachykinin, may also involve in respiratory regulation with potential interplay with the opioid system (40-42).  
232 The same receptor that we identified, Htr2a, has recently been confirmed to express in the PBL and mediate



233 hypercapnia-induced arousal by integrating serotonergic inputs from the dorsal raphe (51). It would be interesting  
234 to identify other neuromodulatory circuits that may be involved in the regulation of OIRD. Similar transcriptomic  
235 profiling strategies can also be applied to the broader breathing control network to exploit the therapeutic potential  
236 of GPCRs in reversing OIRD.

237

238

239

240

241

242

243

244

245

246

247

248

249

250

251

252

253

254

255

256

257

258

259

260

261

262

263

264

265

266 **References**

- 267 1. H. Hedegaard, A. M. Miniño, M. Warner, Drug overdose deaths in the United States, 1999-2018. *NCHS*  
268 *data brief* **356** (2020).
- 269 2. K. T. Pattinson, Opioids and the control of respiration. *Br. J. Anaesth.* **100**, 747-758 (2008).
- 270 3. A. Dahan, L. Aarts, T. W. Smith, Incidence, reversal, and prevention of opioid-induced respiratory  
271 depression. *Anesthesiology* **112**, 226-238 (2010).
- 272 4. P. Skolnick, On the front lines of the opioid epidemic: rescue by naloxone. *European journal of*  
273 *pharmacology* **835**, 147-153 (2018).
- 274 5. A. Dahan *et al.*, Averting opioid-induced respiratory depression without affecting analgesia. *Anesthesiology*  
275 **128**, 1027-1037 (2018).
- 276 6. E. W. Boyer, Management of opioid analgesic overdose. *N. Engl. J. Med.* **367**, 146-155 (2012).
- 277 7. H. W. Matthes *et al.*, Loss of morphine-induced analgesia, reward effect and withdrawal symptoms in mice  
278 lacking the  $\mu$ -opioid-receptor gene. *Nature* **383**, 819 (1996).
- 279 8. A. Dahan *et al.*, Anesthetic Potency and Influence of Morphine and Sevoflurane on Respiration in  $\mu$ -Opioid  
280 Receptor Knockout Mice. *Anesthesiology* **94**, 824-832 (2001).
- 281 9. J. R. Miller *et al.*, A Subregion of the Parabrachial Nucleus Partially Mediates Respiratory Rate Depression  
282 from Intravenous Remifentanyl in Young and Adult Rabbits. *Anesthesiology* **127**, 502-514 (2017).
- 283 10. E. Cinelli, F. Bongiani, T. Pantaleo, D. Mutolo, Activation of  $\mu$ -opioid receptors differentially affects the  
284 preBötzing Complex and neighbouring regions of the respiratory network in the adult rabbit. *Respir.*  
285 *Physiol. Neurobiol.* **280**, 103482 (2020).
- 286 11. A. D. Wei, J.-M. Ramirez, Presynaptic mechanisms and KCNQ potassium channels modulate opioid  
287 depression of respiratory drive. *Front. Physiol.* **10**, 1407 (2019).
- 288 12. I. Prkic *et al.*, Pontine  $\mu$ -opioid receptors mediate bradypnea caused by intravenous remifentanyl infusions  
289 at clinically relevant concentrations in dogs. *J. Neurophysiol.* **108**, 2430-2441 (2012).
- 290 13. A. G. Varga, B. T. Reid, B. L. Kieffer, E. S. Levitt, Differential impact of two critical respiratory centres  
291 in opioid-induced respiratory depression in awake mice. *The Journal of Physiology* **598**, 189-205 (2020).
- 292 14. I. Bachmutsky, X. P. Wei, E. Kish, K. Yackle, Opioids depress breathing through two small brainstem sites.  
293 *Elife* **9**, e52694 (2020).
- 294 15. G. Montandon *et al.*, PreBotzinger complex neurokinin-1 receptor-expressing neurons mediate opioid-  
295 induced respiratory depression. *J. Neurosci.* **31**, 1292-1301 (2011).
- 296 16. G. Montandon, R. Horner, CrossTalk proposal: The preBotzinger complex is essential for the respiratory  
297 depression following systemic administration of opioid analgesics. *J. Physiol.* **592**, 1159-1162 (2014).

- 298 17. P. M. Lalley, P. M. Pilowsky, H. V. Forster, E. J. Zuperku, CrossTalk opposing view: The pre-Botzinger  
299 complex is not essential for respiratory depression following systemic administration of opioid analgesics.  
300 *J. Physiol.* **592**, 1163-1166 (2014).
- 301 18. C. A. Del Negro, G. D. Funk, J. L. Feldman, Breathing matters. *Nat. Rev. Neurosci.* **19**, 351-367 (2018).
- 302 19. J. C. Smith, H. H. Ellenberger, K. Ballanyi, D. W. Richter, J. L. Feldman, Pre-Bötzinger complex: a  
303 brainstem region that may generate respiratory rhythm in mammals. *Science* **254**, 726-729 (1991).
- 304 20. Y. Cui *et al.*, Defining preBotzinger Complex Rhythm- and Pattern-Generating Neural Microcircuits In  
305 Vivo. *Neuron* **91**, 602-614 (2016).
- 306 21. N. L. Chamberlin, C. B. Saper, Topographic organization of respiratory responses to glutamate  
307 microstimulation of the parabrachial nucleus in the rat. *J. Neurosci.* **14**, 6500-6510 (1994).
- 308 22. M. Dutschmann, T. E. Dick, Pontine mechanisms of respiratory control. *Compr Physiol* **2**, 2443-2469  
309 (2012).
- 310 23. A. A. Navarrete-Opazo *et al.*, Endogenous glutamatergic inputs to the Parabrachial Nucleus/Kölliker-Fuse  
311 Complex determine respiratory rate. *Respir. Physiol. Neurobiol.* **277**, 103401 (2020).
- 312 24. S. Kaur *et al.*, A Genetically Defined Circuit for Arousal from Sleep during Hypercapnia. *Neuron* **96**, 1153-  
313 1167 e1155 (2017).
- 314 25. M. Jiang, G. F. Alheid, T. Calandriello, D. R. McCrimmon, Parabrachial-lateral pontine neurons link  
315 nociception and breathing. *Respir. Physiol. Neurobiol.* **143**, 215-233 (2004).
- 316 26. G. Song, C. S. Poon, Lateral parabrachial nucleus mediates shortening of expiration and increase of  
317 inspiratory drive during hypercapnia. *Respir. Physiol. Neurobiol.* **165**, 9-12 (2009).
- 318 27. G. Song, C. S. Poon, Lateral parabrachial nucleus mediates shortening of expiration during hypoxia. *Respir.*  
319 *Physiol. Neurobiol.* **165**, 1-8 (2009).
- 320 28. S. Kaur *et al.*, Glutamatergic signaling from the parabrachial nucleus plays a critical role in hypercapnic  
321 arousal. *J. Neurosci.* **33**, 7627-7640 (2013).
- 322 29. S. E. Saunders, E. S. Levitt, Kölliker-Fuse/Parabrachial complex mu opioid receptors contribute to fentanyl-  
323 induced apnea and respiratory rate depression. *Respir. Physiol. Neurobiol.* **275**, 103388 (2020).
- 324 30. P. M. Lalley, Opiate slowing of feline respiratory rhythm and effects on putative medullary phase-  
325 regulating neurons. *Am. J. Physiol. Regul. Integr. Comp. Physiol.* **290**, R1387-1396 (2006).
- 326 31. E. S. Levitt, A. P. Abdala, J. F. Paton, J. M. Bissonnette, J. T. Williams, mu opioid receptor activation  
327 hyperpolarizes respiratory-controlling Kölliker-Fuse neurons and suppresses post-inspiratory drive. *J.*  
328 *Physiol.* **593**, 4453-4469 (2015).

- 329 32. M. Dutschmann, H. Herbert, The Kolliker-Fuse nucleus gates the postinspiratory phase of the respiratory  
330 cycle to control inspiratory off-switch and upper airway resistance in rat. *Eur. J. Neurosci.* **24**, 1071-1084  
331 (2006).
- 332 33. S. S. McAfee *et al.*, Minimally invasive highly precise monitoring of respiratory rhythm in the mouse using  
333 an epithelial temperature probe. *J. Neurosci. Methods* **263**, 89-94 (2016).
- 334 34. G. Sugihara *et al.*, Detecting Causality in Complex Ecosystems. *Science* **338**, 496-500 (2012).
- 335 35. B. L. Roth, DREADDs for Neuroscientists. *Neuron* **89**, 683-694 (2016).
- 336 36. E. Vardy *et al.*, A new DREADD facilitates the multiplexed chemogenetic interrogation of behavior.  
337 *Neuron* **86**, 936-946 (2015).
- 338 37. E. Sanz, J. C. Bean, D. P. Carey, A. Quintana, G. S. McKnight, RiboTag: Ribosomal Tagging Strategy to  
339 Analyze Cell-Type-Specific mRNA Expression In Vivo. *Curr. Protoc. Neurosci.* **88**, e77 (2019).
- 340 38. R. D. Palmiter, The Parabrachial Nucleus: CGRP Neurons Function as a General Alarm. *Trends Neurosci.*  
341 **41**, 280-293 (2018).
- 342 39. D. Huang, F. S. Grady, L. Peltekian, J. C. Geerling, Efferent Projections of Vglut2, Foxp2 and Pdyn  
343 Parabrachial Neurons in Mice. *J. Comp. Neurol.* <https://doi.org/10.1002/cne.24975> (2020).
- 344 40. M. Niebert *et al.*, Expression and function of serotonin 2A and 2B receptors in the mammalian respiratory  
345 network. *PLoS One* **6**, e21395 (2011).
- 346 41. H. H. Ellenberger, F. M. Smith, Sulfated cholecystokinin octapeptide in the rat: pontomedullary distribution  
347 and modulation of the respiratory pattern. *Can. J. Physiol. Pharmacol.* **77**, 490-504 (1999).
- 348 42. J. Hedner, T. Hedner, P. Wessberg, J. Jonason, Interaction of substance P with the respiratory control system  
349 in the rat. *Journal of Pharmacology and Experimental Therapeutics* **228**, 196-201 (1984).
- 350 43. S. Liu *et al.*, Identification of a novel breathing circuit that controls pain and anxiety. *bioRxiv*  
351 <https://doi.org/10.1101/2020.01.09.900738> (2020).
- 352 44. U. Arvidsson *et al.*, Distribution and targeting of a mu-opioid receptor (MOR1) in brain and spinal cord. *J.*  
353 *Neurosci.* **15**, 3328-3341 (1995).
- 354 45. M. A. Hurlé, A. Mediavilla, J. Florez, Differential respiratory patterns induced by opioids applied to the  
355 ventral medullary and dorsal pontine surfaces of cats. *Neuropharmacology* **24**, 597-606 (1985).
- 356 46. S. Yokota, S. Kaur, V. G. VanderHorst, C. B. Saper, N. L. Chamberlin, Respiratory-related outputs of  
357 glutamatergic, hypercapnia-responsive parabrachial neurons in mice. *J. Comp. Neurol.* **523**, 907-920  
358 (2015).
- 359 47. C. E. Fulwiler, C. B. Saper, Subnuclear organization of the efferent connections of the parabrachial nucleus  
360 in the rat. *Brain Res. Rev.* **7**, 229-259 (1984).

- 361 48. E. Erbs *et al.*, A mu-delta opioid receptor brain atlas reveals neuronal co-occurrence in subcortical  
362 networks. *Brain Struct. Funct.* **220**, 677-702 (2015).
- 363 49. T. M. Anderson *et al.*, A novel excitatory network for the control of breathing. *Nature* **536**, 76-80 (2016).
- 364 50. K. Tokita, T. Inoue, J. D. Boughter, Afferent connections of the parabrachial nucleus in C57BL/6J mice.  
365 *Neuroscience* **161**, 475-488 (2009).
- 366 51. S. Kaur *et al.*, Role of serotonergic dorsal raphe neurons in hypercapnia-induced arousals. *Nature*  
367 *Communications* **11**, 1-15 (2020).
- 368 52. K. Gupta *et al.*, Risk factors for opioid-induced respiratory depression and failure to rescue: a review. *Curr.*  
369 *Opin. Anaesthesiol.* **31**, 110-119 (2018).
- 370 53. G. Sugihara, R. M. May, Nonlinear forecasting as a way of distinguishing chaos from measurement error  
371 in time series. *Nature* **344**, 734-741 (1990).
- 372 54. E. R. Deyle, G. Sugihara, Generalized theorems for nonlinear state space reconstruction. *PLoS One* **6**,  
373 e18295 (2011).
- 374 55. H. Whitney, The imbedding of manifolds in families of analytic manifolds. *Annals of Mathematics*, 865-  
375 878 (1936).
- 376 56. A. M. Fraser, H. L. Swinney, Independent coordinates for strange attractors from mutual information. *Phys*  
377 *Rev A Gen Phys* **33**, 1134-1140 (1986).
- 378 57. E. Sanz *et al.*, Cell-type-specific isolation of ribosome-associated mRNA from complex tissues.  
379 *Proceedings of the National Academy of Sciences* **106**, 13939-13944 (2009).
- 380 58. A. Dobin *et al.*, STAR: ultrafast universal RNA-seq aligner. *Bioinformatics* **29**, 15-21 (2013).
- 381 59. B. Li, C. N. Dewey, RSEM: accurate transcript quantification from RNA-Seq data with or without a  
382 reference genome. *BMC Bioinformatics* **12**, 323 (2011).

383

384

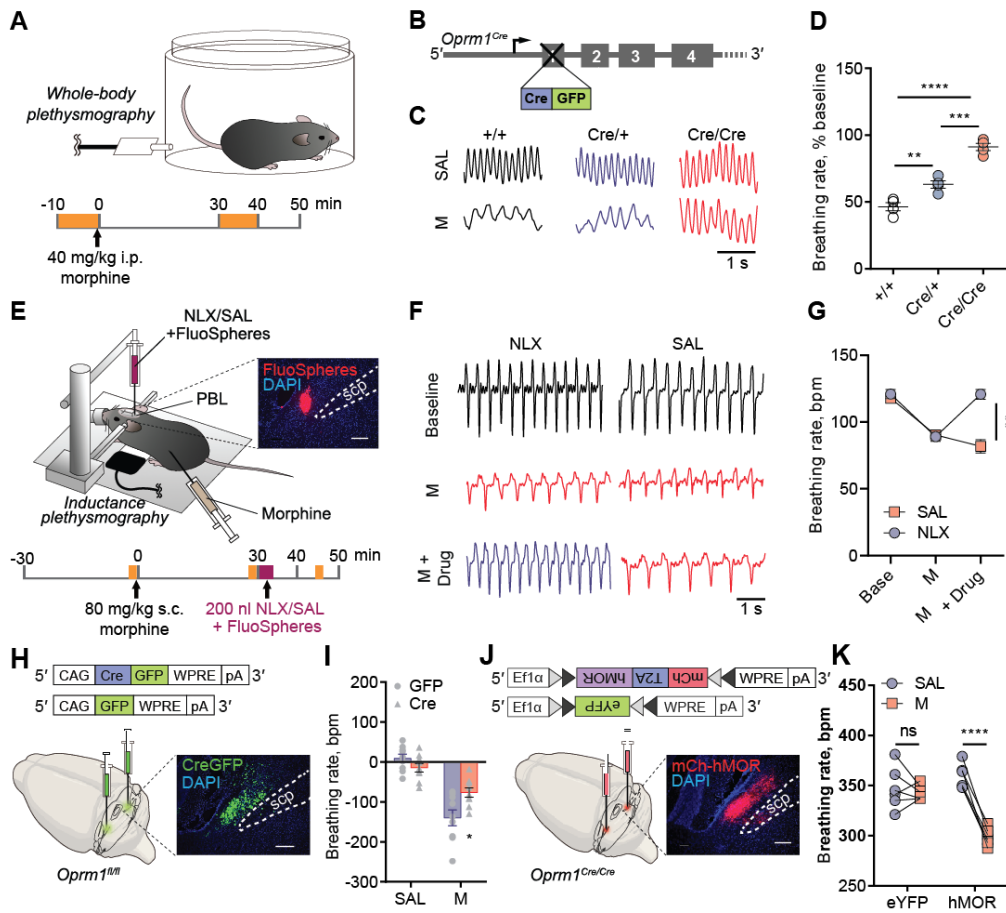

385

386 **Figure 1. MOR signaling in the PBL mediates morphine-induced respiratory depression.** (A) Schematics of  
 387 breathing monitoring in awake mice with whole-body plethysmography before and after systemic morphine  
 388 injection (refer to C, D, I, K). (B-D) *Oprm1*<sup>+/+</sup>, *Oprm1*<sup>Cre/+</sup>, and *Oprm1*<sup>Cre/Cre</sup> mice (B) displayed different breathing  
 389 patterns (C) and rate changes (D) in response to systemic morphine injection. (E) Schematics of breathing  
 390 monitoring in anesthetized mice with inductance plethysmography, during systemic morphine injection and PBL-  
 391 specific blockade of MOR signaling. Onset, histology of the co-injected FluoSpheres in the PBL. Scp, superior  
 392 cerebellar peduncle. (F) Representative plethysmographs from naloxone (NLX) and saline (SAL) injected groups  
 393 before morphine, after morphine, and after drug injections into the PBL. (G) Injecting naloxone (n = 5), but not  
 394 saline (n = 5) into the PBL rescued morphine-induced respiratory depression. (H) Schematics of PBL-specific  
 395 knockout of the *Oprm1* gene by stereotactically injecting AAV-Cre-GFP into the PBL of the *Oprm1*<sup>fl/fl</sup> mice. (I)  
 396 PBL-specific *Oprm1* knockout (n = 9) significantly attenuated OIRD compared to the GFP injected control group  
 397 (n = 9) after systemic morphine injection. (J) Schematics of PBL-specific rescue of the *Oprm1* gene in *Oprm1*-null  
 398 background by stereotactically injecting AAV-DIO-hMOR into the PBL of the *Oprm1*<sup>Cre/Cre</sup> mice. (K) Mice with  
 399 PBL-specific rescue of *Oprm1* (n = 6) displayed OIRD phenotype, whereas eYFP injected control group (n = 6)  
 400 remained insensitive after systemic morphine injection. Data are presented as mean ± SEM. Statistical tests, One-  
 401 way ANOVA with Tukey's multiple comparison post-hoc test (D) or Two-way ANOVA with Bonferroni's multiple  
 402 comparison post-hoc test (G, I, K). \*, *p* < 0.05; \*\*, *p* < 0.01; \*\*\*, *p* < 0.001; \*\*\*\*, *p* < 0.0001. Scale bar, 1s (C, F)  
 403 or 200 μm (E, H, J).

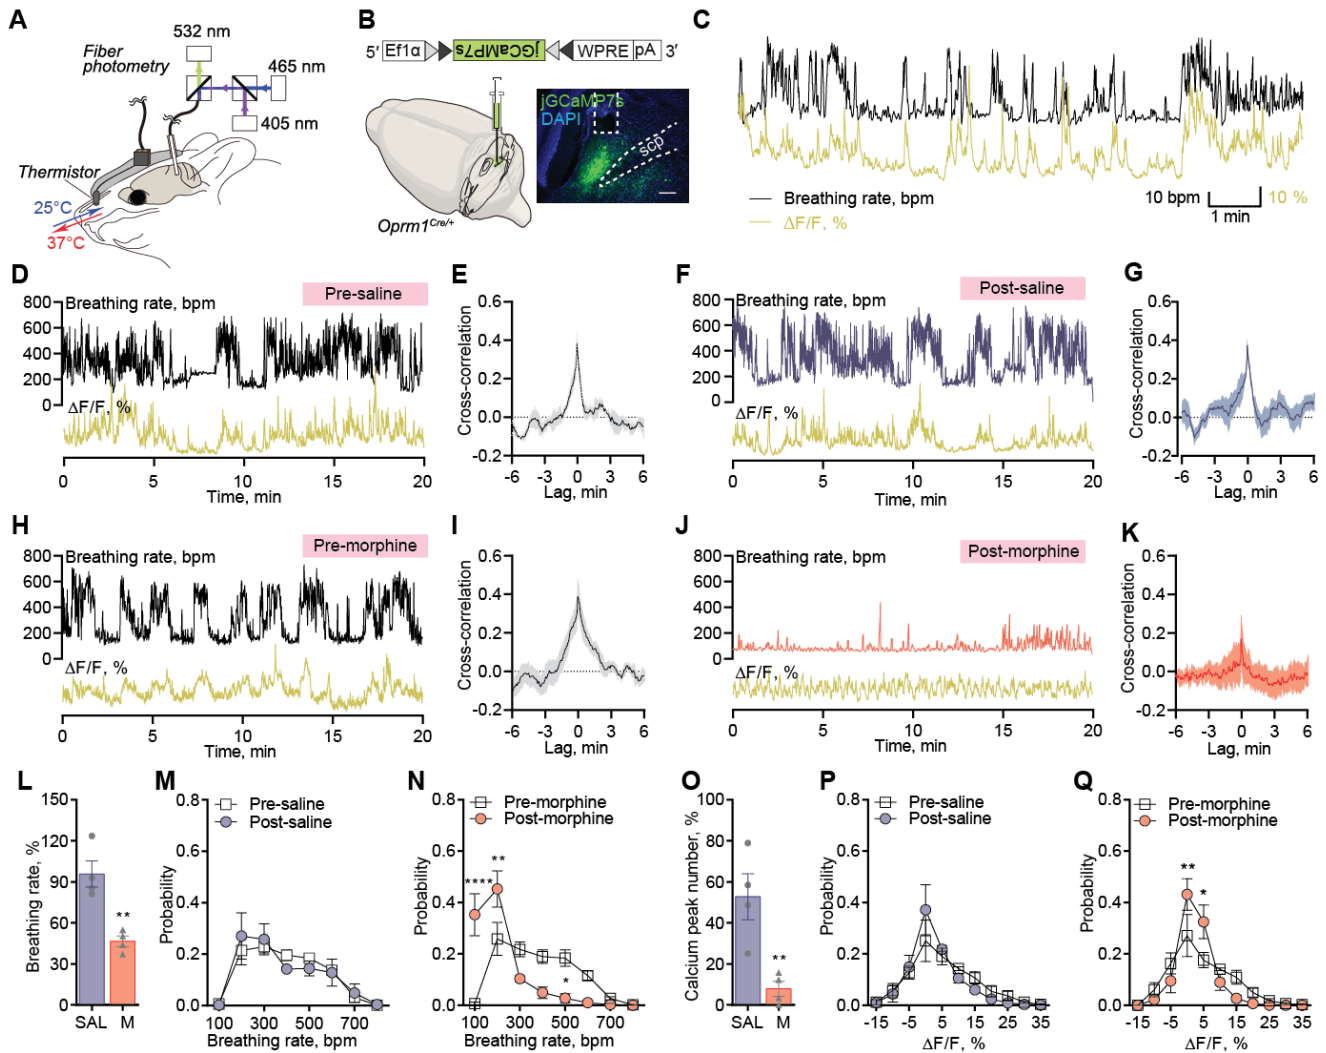

404

405 **Figure 2. Morphine disrupts the tight correlation between PBL *Oprm1* neuronal activity and respiratory rate.**  
 406 (A) Schematics of simultaneous recording of respiration and PBL *Oprm1* calcium activity with a thermistor sensor  
 407 (implanted in the nasal cavity) and fiber photometry. (B) The genetically encoded calcium indicator, jGCaMP7s,  
 408 was specifically expressed in the PBL *Oprm1* neurons by stereotaxic injection of AAV-DIO-jGCaMP7s into the PBL  
 409 of the *Oprm1*<sup>Cre/+</sup> mice. (C) Time-matched traces of PBL *Oprm1* activity and breathing rate as calculated from the  
 410 thermistor sensor. (D, F, H, J) Simultaneously recorded PBL *Oprm1* calcium activity and respiratory rate before and  
 411 after systemic saline or morphine injection. (E, G, I, K) Cross-correlogram of calcium signal and respiratory rate  
 412 in the pre-saline, post-saline, pre-morphine, and post-morphine groups (n = 4). (L) Morphine injection significantly  
 413 depressed respiratory rate to around 50% of the baseline (n = 4), whereas saline injection (n = 4) did not affect the  
 414 respiratory rate. (M-N) Normalized distribution of breathing rate before and after saline (M) and morphine (N)  
 415 injections (n = 4). (O) The number of calcium peaks was significantly decreased after morphine injection (n = 4)  
 416 compared to saline injection (n = 4). (P-Q) Normalized distribution of calcium signals before and after saline (P)  
 417 and morphine (Q) injections (n = 4). Data are presented as mean ± SEM. Statistical tests, Unpaired t-test (L, O) or  
 418 Two-way ANOVA with Bonferroni's multiple comparison post-hoc test (M, N, P, Q). \*, p < 0.05; \*\*, p < 0.01;  
 419 \*\*\*\*, p < 0.0001. Scale bar, 200 μm.

420

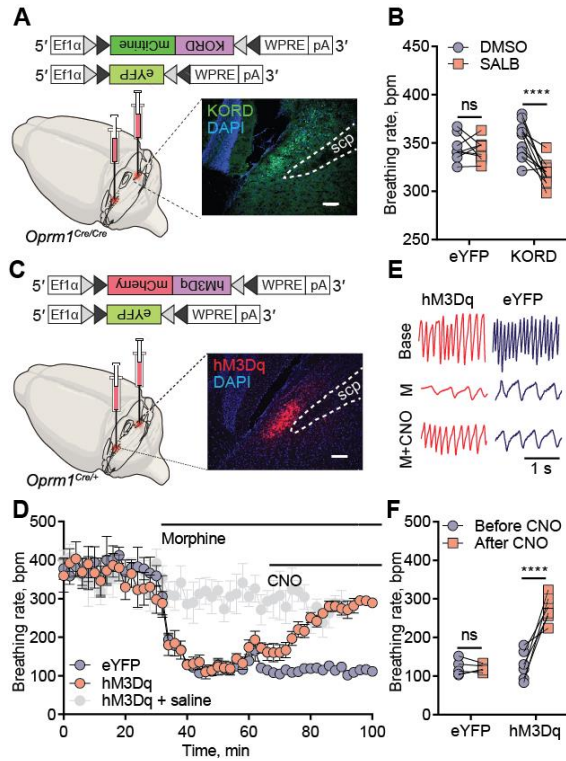

421

422 **Figure 3. Inhibition of PBL<sup>Oprm1</sup> neurons mimics OIRD, and chemogenetic activation of PBL<sup>Oprm1</sup> neurons**  
 423 **rescues OIRD.** (A) Schematics of mimicking OIRD through PBL<sup>Oprm1</sup> inhibition using an inhibitory  $\kappa$ -opioid  
 424 receptor-derived DREADD (KORD). Here, AAV-DIO-KORD-mCitrine is stereotaxically injected into the bilateral  
 425 PBL of *Oprm1<sup>Cre/Cre</sup>* mice to express in the PBL<sup>Oprm1</sup> neurons. (B) Salvinorin B (SALB, 7.5 mg/kg) injection  
 426 significantly decreased respiratory rate compared to the DMSO control in the KORD-expressing mice (n = 11). In  
 427 contrast, no changes were observed in eYFP-expressing mice (n = 8). (C) Schematics of rescuing OIRD through  
 428 PBL<sup>Oprm1</sup> activation by an excitatory DREADD, hM3Dq. Here, AAV-DIO-hM3Dq-mCherry was expressed in the  
 429 bilateral PBL of *Oprm1<sup>Cre/+</sup>* mice. (D) Activation of PBL<sup>Oprm1</sup> neurons by injecting Clozapine N-oxide (CNO, 5  
 430 mg/kg) rescued the morphine-induced respiratory depression to control levels in the hM3Dq-expressing group (n =  
 431 6), but not the eYFP-expressing group (n = 5). (E-F) Representative plethysmograph and quantitative analysis  
 432 depicting OIRD rescued by CNO injection in the hM3Dq-expressing group (n = 7), but not in the eYFP-expressing  
 433 group (n = 5). Statistical tests, Two-way ANOVA with Bonferroni's multiple comparison post-hoc test. ns, not  
 434 significant; \*\*\*\*,  $p < 0.0001$ . Scale bar, 200  $\mu\text{m}$ .

435



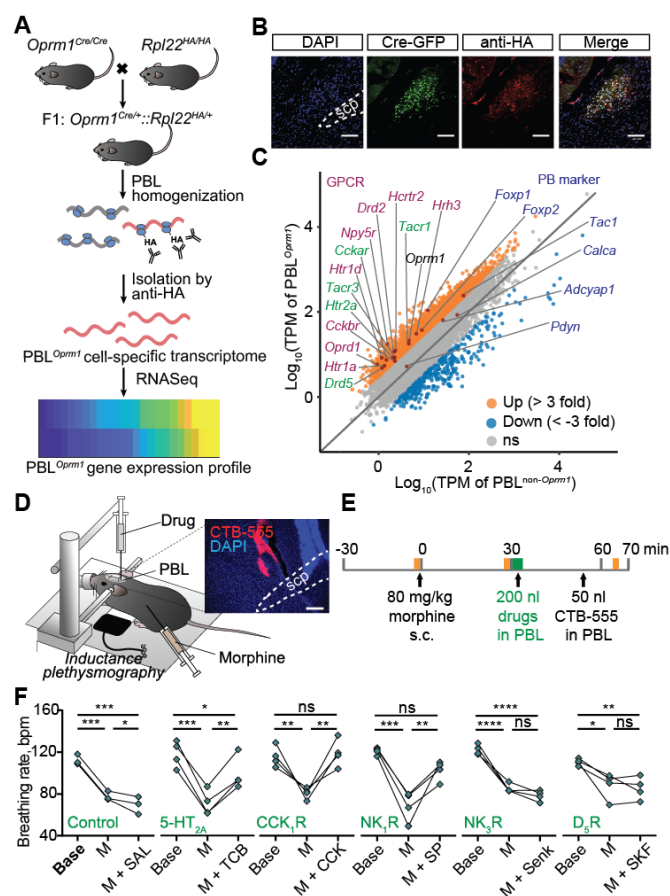

436

437 **Figure 4. Rescue of OIRD through PBL<sup>*Oprm1*</sup> stimulation via receptors identified by RiboTag RNA**  
 438 **sequencing.** (A) Schematics of obtaining PBL<sup>*Oprm1*</sup> active transcriptome. *Oprm1<sup>Cre/Cre</sup>* mice were crossed with  
 439 RiboTag mice, which express hemagglutinin-tagged ribosomal protein L22 (*Rpl22<sup>HA</sup>*) in a Cre-dependent manner.  
 440 After collecting the PBL, active mRNAs bound to the *Rpl22<sup>HA</sup>* were isolated with anti-HA antibody-mediated  
 441 ribosome pull-down and sequenced. (B) Immunohistochemistry of the PBL region of the *Oprm1<sup>Cre::</sup>Rpl22<sup>HA</sup>* mice  
 442 with anti-GFP and anti-HA antibodies showed that the Cre:GFP and *Rpl22<sup>HA</sup>* were co-expressed in PBL<sup>*Oprm1*</sup>  
 443 neurons. (C) Fourteen GPCR mRNAs (magenta and green) were enriched more than three-fold in PBL<sup>*Oprm1*</sup>  
 444 compared with non-*Oprm1* neurons in the PBL. Conventional parabrachial markers (dark blue), such as *Foxp2*,  
 445 *Tac1*, and *Adcyap1* genes were enriched in PBL<sup>*Oprm1*</sup> neurons, but not *Pdyn* and *Calca*. (D-E) Schematics of rescuing  
 446 OIRD through artificial stimulation of receptors expressed on PBL<sup>*Oprm1*</sup> neurons by PBL-specific injection of the  
 447 agonists. Onset, histology of cholera toxin subunit B (CTB)-555 for marking the injection site. (F) Breathing rate  
 448 decreased upon systemic morphine injection and rescued by PBL-specific injection of the agonists of 5-HT<sub>2A</sub>,  
 449 CCK<sub>1</sub>R, and NK<sub>1</sub>R. For the list of pharmacological agents, see Supplementary Table 1. Statistical tests, RM One-  
 450 way ANOVA with Tukey's multiple comparison post-hoc test, ns, not significant; \*,  $p < 0.05$ ; \*\*,  $p < 0.01$ ; \*\*\*,  $p$   
 451  $< 0.001$ , \*\*\*\*,  $p < 0.0001$ . Scale bar, 100  $\mu$ m (B) or 200  $\mu$ m (D).

452

453

## 454 **Supplementary Materials**

### 455 **Materials and Methods**

456 **Experimental Animals.** The *Oprm1*<sup>Cre:GFP</sup> mouse line was generated from the lab of Dr. Richard Palmiter (see  
457 below). C57BL/6J (Stock No. 000664), *Oprm1*<sup>fl/fl</sup> (Stock No. 030074), RiboTag *Rpl22*<sup>HA/HA</sup> (Stock No. 011029) and  
458 Ai14 *Gt(ROSA)26Sor*<sup>tm14(CAG-tdTomato)Hze</sup> (Stock No. 007914) mouse lines were obtained from The Jackson  
459 Laboratory. Homozygous RiboTag and Ai14 mice were crossed with homozygous *Oprm1*<sup>Cre</sup> mice for RiboTag and  
460 anatomy experiments, respectively. Both male and female mice were used in all studies. Animals were randomized  
461 to experimental groups, and no sex differences were noted. Mice were maintained on a 12-h light/dark cycle and  
462 provided with food and water *ad libitum*.

463 **Generation of *Oprm1*<sup>Cre</sup> mice.** A cassette encoding Cre:GFP was inserted just 5' of the initiation codon in the first  
464 coding exon of the *Oprm1* gene. The 5' arm (~3.1 kb with *PacI* and *SalI* sites at 5' and 3' ends, respectively) and 3'  
465 arm (~4.5 kb with *XhoI* and *NotI* sites at 5' and 3' ends, respectively) of *Oprm1* gene were amplified from a  
466 C57BL/6 BAC clone by PCR using Q5 Polymerase (New England Biolabs, USA) and cloned into polylinkers of a  
467 targeting construct that contained mnCre:GFP, a FRT-flanked Sv40Neo gene for positive selection, and HSV  
468 thymidine kinase and *Pgk*-diphtheria toxin A chain genes for negative selection. The mnCre:GFP cassette has a  
469 Myc-tag and nuclear localization signals at the N-terminus of Cre recombinase, which is fused to green fluorescent  
470 protein followed by a SV40 polyadenylation sequence. The construct was electroporated into G4 ES cells  
471 (C57BL/6 × 129 Sv hybrid), and correct targeting was determined by Southern blot of DNA digested with *KpnI*  
472 using a <sup>32</sup>P-labeled probe downstream of the 3' arm of the targeting construct. Twelve of the 84 clones analyzed  
473 were correctly targeted. One clone that was injected into blastocysts resulted in good chimeras that transmitted the  
474 targeted allele through the germline. Progeny were bred with *Gt(Rosa)26Sor-FLP* recombinase mice to remove the  
475 SV-Neo gene. Mice were then continuously backcrossed to C57BL/6 mice. Routine genotyping is performed with  
476 three primers: 5' CCT TCC ACT CAG AGA GTG GCG (*Oprm1* forward), 5' CCT TCC ACT CAG AGA GTG  
477 GCG (*Oprm1* reverse), and 5' GGC AAA TTT TGG TGT ACG GTC AG (Cre reverse). The wild-type allele gives  
478 a band of ~500 bp, while the targeted allele provides a band with ~400 bp after 34 cycles with 20-s annealing at 60  
479 °C.

480 **Respiratory measurements. Inductance plethysmography.** Inductance plethysmography was performed by placing  
481 a piezoelectric film beneath the chest of an anesthetized animal, which converts the chest movement into a voltage  
482 signal. The PowerLab system with LabChart 8 software (ADInstruments Inc., USA) was used for data acquisition,  
483 inspiratory and expiratory peak detection, and rate and amplitude calculation. Data were sampled at 100 or 400 Hz,  
484 low-pass filtered at 10 Hz, and smoothed with a 100-ms moving window. Automatic peak detection was validated

485 with manual peak detection. Since the location of the sensor is subject to the slight movements of the animal's body,  
486 the raw voltage value of the respiratory peak is less representative of the breathing amplitude.

487 *Whole-body plethysmography (WBP).* A custom-built WBP chamber was utilized for measuring respiratory  
488 changes. The PowerLab system with LabChart 8 software was used for data acquisition, inspiratory and expiratory  
489 peak detection, and rate and amplitude calculation. Data were sampled at 1 kHz, band-pass filtered at 1–10 Hz, and  
490 smoothed with a 100-ms moving window. Automatic peak detection was validated with manual peak detection.

491 Mice were introduced into the WBP chamber for three 20 min habituation sessions before testing. Mice were kept  
492 in the chamber for 10 - 12 min during the testing session before and after the drug injection. After 5 - 10 min of  
493 chamber introduction, a stable pattern was reached, and the averaged value of a stabilized 1 min segment was  
494 analyzed.

495 *Micro thermistor-based plethysmography.* A custom-built micro thermistor was implanted into the mouse nasal  
496 cavity to detect changes in temperature between inspiratory and expiratory airflow (18). The sensor was assembled  
497 using a Negative Temperature Coefficient (NTC) thermistor (TE Connectivity Ltd., Switzerland), an interconnector  
498 (Mill-Max Mfg. Corp., USA), and a voltage divider (Phidgets Inc., Canada). PowerLab was used for data  
499 acquisition, inspiratory and expiratory peak detection, and rate and amplitude calculation. Data were sampled at 1  
500 kHz, filtered with a 0.4 - 25 Hz band-pass filter, and smoothed with a 50-ms moving window. Automatic peak  
501 detection was validated with manual peak detection.

502 Minute volume is approximated by first calculating the integral of the voltage channel for each breath, summing  
503 across one minute, then normalizing against the average value of the first 30 minutes. Values are shown after  
504 normalization as the raw values vary considerably across animals. For comparison before and after CNO injection,  
505 the averaged minute volume for 0-30 min and 30-75 min after morphine injection are used. Values during the  
506 episodes when the sensor accidentally fell off due to the animal body rotation were excluded.

507 **Stereotaxic surgery.** Mice were anesthetized with isoflurane (5% induction, 1.5-2% maintenance with a nose cone;  
508 Dräger Vapor 2000, Draeger, Inc., USA) and placed onto a water recirculating heating pad throughout the surgery.  
509 Mice were placed on a stereotaxic frame (David Kopf Instruments, USA), the skull was exposed, and the cranium  
510 was drilled with a micro motor handpiece drill (Foredom, USA: one or two holes for viral injection(s) or  
511 pharmacological delivery, two holes for screws with implantation, one or two holes for optic fibers, and one hole  
512 for a micro thermistor). The virus or drug was injected unilaterally (right side) or bilaterally into the PBL  
513 (anteroposterior (AP), -1 mm from lambda; mediolateral (ML),  $\pm 1.5$  mm; dorsoventral (DV), -3.5 mm, re-zero at  
514 the midline with the same AP). Injection of the virus or drug was administered with a glass pipette (tips broken for  
515 an inner diameter of 20  $\mu$ m) connected to the Nanoject III Programmable Nanoliter Injector (Drummond Scientific,  
516 USA) at a rate of 60 nL/min. Naloxone was injected at a rate of 100 nL/min with a syringe (65458-01, Hamilton,

517 USA) connected to an ultra-micropump (UMP-3, World Precision Instruments, USA). A glass pipette or syringe  
518 needle was retracted from the brain slowly after 5 - 10 min. For implantation, optic fibers were implanted above the  
519 injection site with the DV noted below, and the micro thermistor head was carefully lowered into the hole above  
520 the nasal cavity (AP +3.5 from the nasal fissure, ML 0.3). The implants were covered with superglue and dental  
521 cement for stabilization. Behavioral experiments were performed three weeks after virus injection and one week  
522 after the micro-thermistor implantation unless otherwise noted.

523 For the PBL-specific conditional knockout of the *Oprm1* gene, *Oprm1<sup>fl/fl</sup>* mice were bilaterally injected with 200 nL  
524 of AAVDJ-CAG-Cre-GFP (1.25E+12 GC/mL) or control AAVDJ-CAG-GFP (2.10E+12 GC/mL) (Salk Institute  
525 Viral Vector Core) into the PBL.

526 For PBL-specific rescue of the *Oprm1* gene, *Oprm1<sup>Cre/Cre</sup>* mice were bilaterally injected with 200 nL of AAV-hSyn-  
527 DIO-mCherry-T2A-FLAG-hOprm1 (1.5E+13 GC/mL) or control AAV-DIO-eYFP (2.12E+12 GC/mL) into the  
528 PBL.

529 For fiber photometry, *Oprm1<sup>Cre/+</sup>* mice were unilaterally injected with 200 nL of AAV-DIO-jGCaMP7s (3.75 E+13  
530 GC/mL) or control AAV-DIO-eYFP (2.12E+12 GC/mL) into the PBL, and a stainless steel mono fiberoptic cannula  
531 (400  $\mu$ m diameter, 0.37 NA, Doric Lenses) was implanted 0.05 mm above the injection site.

532 For chemogenetics, 200 nL of AAV-DIO-hM3Dq-mCherry (6.56E+11 GC/mL), AAV-DIO-KORD-mCitrine, or  
533 control AAV-DIO-eYFP (2.12E+12 GC/mL) was bilaterally injected into the PBL of *Oprm1<sup>Cre/+</sup>* (for hM3Dq) or  
534 *Oprm1<sup>Cre/Cre</sup>* (for KORD) mice.

535 **Pharmacology.** Morphine sulfate (Spectrum Chemical, USA) was dissolved in 0.9% saline to make a 4 mg/mL  
536 working concentration. The final concentration of morphine was 10 mg/kg in PBL-specific *Oprm1* knockout tests,  
537 80 mg/kg in PBL-specific rescue of OIRD, and 40 mg/kg in all other experiments. For the characterization of  
538 morphine-induced respiratory depression, mice were introduced into the WBP chamber 30 - 40 min after morphine  
539 injection.

540 For PBL-specific rescue of OIRD with naloxone, wild-type mice were kept under isoflurane anesthesia until the  
541 breathing rate was stable for 10 min. Then, 80 mg/kg morphine (s.c.) was systemically administered. After 30 min,  
542 200 nL of 0.4 mg/mL naloxone (Somerset Therapeutics, USA) and FluoSpheres (540/560, 10% v/v, Thermo Fisher,  
543 USA) mixture or a control 0.9% saline-FluoSpheres mixture was stereotaxically injected bilaterally into the PBL.  
544 Breathing was analyzed from three 2-min episodes: immediately before morphine injection, 30 min after morphine  
545 injection, and 10 min after naloxone or saline injection.

546 For endogenous receptor activation of PBL *Oprm1* neurons, wild-type mice were kept under 1-1.5% isoflurane  
547 anesthesia until breathing rate is stable (fluctuation < 10 bpm) for 10 min. Then, 80 mg/kg morphine (s.c.) was

548 systemically administered. After 30 min, 200 nL of the pharmacological agent (Supplementary Table 1) was  
549 stereotaxically injected into the PBL bilaterally. 50 nL of Cholera Toxin Subunit B (CTB)-555 was subsequently  
550 injected with the same coordinates to mark the injection site. Breathing was analyzed from three 2-min episodes:  
551 immediately before morphine injection, 30 min after morphine injection, and 30 min after drug injection.

552 **Fiber photometry.** Fiber photometry (1-site Fiber Photometry System, 405 and 465 nm, Doric Lenses Inc, Canada)  
553 with Doric Neuroscience Studio software was used to record PBL<sup>Oprm1</sup> neural activities. GCaMP isosbestic  
554 fluorescence (405-nm excitation) and calcium-dependent fluorescence (465-nm excitation) were recorded at a  
555 sampling rate of 12 kHz, and data were analyzed with the Doric Neuroscience Studio software. F0 was calculated  
556 by a least mean squares fitting of the 405-nm channel relative to the 465-nm channel, and  $\Delta F/F$  was calculated as  
557  $(F_{465} - F_{405\_fitted})/F_{405\_fitted}$ . Data were further analyzed with custom MATLAB scripts.

558 For concurrent measurements of PBL<sup>Oprm1</sup> neural activity and respiration, animals were recorded in their home cage  
559 for 30 min before and 30 min after intraperitoneal (i.p.) morphine injection at 40 mg/kg. Cross-correlation analysis  
560 between the calcium signals and respiration data was performed with the z-scored data, then with the MATLAB  
561 “xcorr” function using the normalized option such that autocorrelations at zero lag equal 1. Calcium peaks were  
562 detected with the MATLAB “findpeaks” function.

563 **Convergent cross-mapping.** State-space reconstruction models were generated using the framework of convergent  
564 cross mapping (34), a nonlinear time series embedding method (53) based on the Takens theorem and its generalized  
565 form (54) that builds low-dimensional manifolds from time series and makes predictions across variables. Analysis  
566 and predictions were calculated using the R package rEDM 0.7.2 (<https://cran.r-project.org/web/packages/rEDM/>)  
567 for evaluation and rEDM 0.7.4 (<https://ha0ye.github.io/rEDM/>) for model predictions in the RStudio environment.  
568 This program was run on a dual Intel Xeon Gold 6148 Server with 384GB RAM or an Intel Core i9 2.4 GHz  
569 MacBook Pro with 32 GB RAM. Key parameters were determined individually by lagged coordinate embedding  
570 using the simplex function implementation in rEDM to optimize predictive skill as measured by the predicted over  
571 observed rho. Parameters include the delay tau, which gives the characteristic timescale of the time series, and the  
572 embedding dimensionality, which estimates the number of variables driving the system and approximates the real  
573 number of variables as given by the Whitney embedding theorem (55) as minimally equal to the real number n of  
574 variables, but no more than two times  $n + 1$  ( $n \leq E \leq 2n + 1$ ). The choice of tau was also informed by minimizing  
575 mutual information (56). This approximately corresponds to an autocorrelation of ~0.3, which was applied if it  
576 maximized predictive skill across datasets. To prevent data contamination, an exclusion radius was applied that was  
577 larger than the respiration rate smoothing window of five timesteps. Whenever the data allowed, an exclusion radius  
578 of  $E \cdot \tau$  was applied, unless the data was insufficient to apply this upper bound. In this case, the exclusion radius  
579 would be made just larger than tau.

580 **Chemogenetics.** For KORD-mediated inhibition, salvinorin B (SALB, Cayman Chemical, USA) was diluted in  
581 100% DMSO to make a 15 mg/mL stock solution, then further diluted in 0.9% saline (10% v/v) to make a 1.5  
582 mg/mL working suspension. The control used consisted of DMSO diluted in 0.9% saline to make 10% v/v. Mice  
583 were injected with 5  $\mu$ L/g of body weight. The final concentration was 7.5 mg/kg. Behavioral testing was performed  
584 immediately after the SALB injection. Animals that did not show the viral expression on one side were excluded  
585 from the analysis.

586 For hM3Dq-mediated excitation, clozapine-N-oxide (CNO, Cayman Chemical, USA) was diluted in 0.9% saline to  
587 make a 1 mg/mL working solution. Mice were injected with 5  $\mu$ L/g of body weight, and the final concentration was  
588 5 mg/kg. For quantification of the CNO effect, both the 0 - 10 min before and 20 - 30 min after CNO injection  
589 periods were analyzed.

590 **RiboTag profiling and library generation.** Isolation of polysome-associated mRNA using RiboTag was  
591 performed as previously described with minor modification (37, 57). Briefly, 250- $\mu$ m thick slices containing the  
592 PBL were obtained using a VT 1200S Vibratome (Leica, Germany). The region of interest was further dissected  
593 with surgical scissors. Tissues were transferred into 1.5 mL microcentrifuge tubes containing homogenization buffer  
594 (50 mM Tris, pH 7.5, 100 mM KCl, 12 mM MgCl<sub>2</sub>, 1% Nonidet P-40, 1 mM dithiothreitol (DTT), 200 U/mL  
595 RNasin, 1 mg/mL heparin, 100  $\mu$ g/mL cycloheximide, and 1 $\times$  protease inhibitor mixture) and mechanically  
596 dissociated and lysed using pellet pestles (7495211500-DS, DWK Life Sciences LLC, USA). Lysates were  
597 centrifugated for 10 min at 12,000 rpm at 4  $^{\circ}$ C. Post mitochondrial supernatants were transferred to fresh 1.5 mL  
598 microcentrifuge tubes. For immunoprecipitation, 4  $\mu$ L of anti-hemagglutinin1.1 antibody (BioLegend, USA) was  
599 added to the lysate-containing tube and incubated for 4 h at 4  $^{\circ}$ C on a microtube rotator. After incubation, magnetic  
600 protein A/G beads (Cat. No. 88803; Thermo Fisher Scientific) were added to the lysate with antibody prior to  
601 incubation on a microtube rotator at 4  $^{\circ}$ C overnight. The following day, the microcentrifuge tubes were placed into  
602 the magnetic stand on ice. The supernatant was removed from sample tubes and used for non-Oprm1 control  
603 subsequently. The magnetic beads were washed with high-salt buffer (50 mM Tris, pH 7.5, 300 mM KCl, 12 mM  
604 MgCl<sub>2</sub>, 1% Nonidet P-40, 1 mM DTT, and 100  $\mu$ g/mL cycloheximide) to remove the non-specific binding from  
605 immunoprecipitation. After washing, 350  $\mu$ L of RLT plus buffer with  $\beta$ -mercaptoethanol from the RNeasy Mini  
606 Kit (Qiagen, Germany) was added. The extraction of total RNA was performed with the RNeasy Mini Kit. All RNA  
607 samples were quantified with the *Qubit RNA Assay Kit (Invitrogen, USA) and analyzed* with the RNA 6000 Pico  
608 Kit (Agilent, USA).

609 Isolated RNA was prepared using the Trio RNA-Seq (Cat. No. 0507-08; NuGEN, USA). Briefly, cDNA was  
610 synthesized from the total RNA using reverse transcriptase with oligo dT and resynthesized to produce double-  
611 stranded cDNA. After amplification of double-stranded cDNA, cDNA was purified with AMPure XP Beads (Cat.

612 No. A63881; Beckman Coulter, USA), fragmented to the library, and classified using a barcoded adaptor. All  
613 libraries were quantified by qPCR and analyzed *with the RNA 6000 Pico Kit*.

614 **RiboTag profiling analysis.** RNA library quality was confirmed using the 2100 Bioanalyzer (Agilent, USA).  
615 Barcoded samples *were pooled* and sequenced on the NextSeq500 (Illumina, USA) with the 75-bp read length  
616 single-end format. Image analysis and base calling were conducted using the Illumina CASAVA-1.8.2 software.  
617 Sequencing read quality was evaluated with the FastQC package  
618 (<http://www.bioinformatics.babraham.ac.uk/projects/fastqc>). Fastq reads were aligned to the reference genome  
619 (GRCm38.p6) using the STAR tool (version 2.7.2) (58). The quantification package RSEM (version 1.2.28) (59)  
620 was utilized to calculate gene expression from BAM files. In doing so, estimated count and TPM (Transcripts Per  
621 Million) were computed. Fold changes were calculated from TPM values (estimated counts > 20) between HA-tag  
622 and controls. To visualize fold changes, we utilized the ggplot2 package from R. UP (> 3 fold change) and DOWN  
623 (< -3 fold change) were highlighted with orange and blue colors, respectively. Key genes for the parabrachial marker  
624 and GPCRs were further annotated.

625 **Histology.** Mice were euthanized with CO<sub>2</sub> at a flow rate of 1.2 liters per minute (LPM), perfused intracardially  
626 with ice-cold phosphate-buffered saline (PBS), and fixed with 4 % paraformaldehyde (PFA) in phosphate buffer  
627 (PB). The brain was extracted, post-fixed in 4 % PFA overnight and dehydrated in 30 % sucrose in PBS until sliced.  
628 Frozen brains were cut into 50 µm coronal slices using a CM 1950 cryostat (Leica, Germany) and stored in PBS  
629 before mounting. The slices were mounted on Superfrost Microscope Slides (Fisher Scientific, USA) with DAPI  
630 Fluoromount-G mounting media (Southern Biotech, USA) for imaging.

631 **Immunohistochemistry.** To validate the co-expression of Cre:GFP and Rpl22:HA in PBL<sup>*Oprm1*</sup> neurons,  
632 immunohistochemistry for HA and GFP was performed. To validate the conditional knockout of the *Oprm1* gene  
633 in the PBL, we performed immunohistochemistry for MOR.

634 Mice were euthanized with CO<sub>2</sub> at a flow rate of 1.2 LPM, perfused intracardially with ice-cold PBS, and fixed  
635 with 4 % PFA in PB. The brain was extracted, post-fixed in 4 % PFA overnight and dehydrated in 30 % sucrose in  
636 PBS until sliced. Frozen brains were cut into 30 µm coronal slices with a CM 1950 cryostat and stored in PBS.

637 Sections were washed with PBST (PBS with 3% Tween-20, Fisher BioReagents, USA). After blocking with 3 %  
638 normal donkey serum (NDS, Jackson ImmunoResearch Inc., USA) for 1 h at room temperature and rinsing with  
639 PBST, the slices were incubated with the corresponding antibodies: mouse monoclonal anti-HA1.1 (1:1000,  
640 BioLegend, USA), chicken anti-GFP (1:1000, Aves Labs Inc, USA), and rabbit anti-MOR (1:1000, ImmunoStar,  
641 USA) antibodies at 4 °C for overnight (anti-HA1.1 and anti-GFP) or 24 h (anti-MOR). The next day, brain tissues  
642 were rinsed with PBST and incubated in Alexa Fluor<sup>®</sup> 647-conjugated Donkey Anti-Mouse IgG, Alexa Fluor<sup>®</sup> 488-  
643 conjugated Donkey Anti-Chicken IgY, and Alexa Fluor<sup>®</sup> 647-conjugated Donkey Anti-Rabbit IgG (1:1000, Jackson

644 ImmunoResearch Inc., USA) in 3 % NDS for 90 min at room temperature. After washing with PBS, brain slices  
645 were mounted on Superfrost Microscope Slides with DAPI Fluoromount-G mounting media for imaging.

646 **RNA *in situ* hybridization.** RNA *in situ* hybridization was performed using the RNAscope Fluorescent Multiplex  
647 Assay using the probes and kits purchased from Advanced Cell Diagnostics (ACD, USA). Brains were collected  
648 from wild type mice and immediately frozen with 2-methylbutane chilled with dry ice. Frozen brains were cut into  
649 20- $\mu$ m coronal slices with a CM 1950 cryostat and directly mounted onto the Superfrost Plus Microscope Slides  
650 (Fisher Scientific). Sample preparation, pretreatment, and signal detection were performed according to the ACD  
651 protocols. Probes used are listed below: *Oprm1* (ACD #315841), *Htr2a* (#401291), *Cckar* (#313751), *Drd5*  
652 (#494411), *Tacr3* (#481671), *Tacr1* (#428781), *Cre* (#402551), *Slc17a6* (#319171), and *Slc32a1* (#319191).

653 Two to three representative images from the PBL (AP = -5.0 to -5.2) were selected from n = 3 mice, and PBL cells  
654 within a field of view of 300  $\mu$ m x 300  $\mu$ m (for *Oprm1* colocalization with *Cre*, *Htr2a*, *Cckar*, *Tacr3*, *Tacr1*, and  
655 *Drd5*) or 600  $\mu$ m x 600  $\mu$ m (for *Oprm1* colocalization with *Slc17a6* and *Slc32a1*) were used for quantification.  
656 Quantification of the colocalization is done manually with ImageJ software according to the ACDBio technical  
657 note. DAPI-stained nuclei were first identified, then the cell contour was defined with a 2- $\mu$ m radius surrounding  
658 the DAPI signals. Cells containing at least five puncta inside the imaginary boundary were labeled as positive.

659 **Imaging.** Images for verification of injection and implantation site and anti-MOR staining for conditional knockout  
660 validation were taken with a BZ-X710 all-in-one fluorescence microscope with BZ-X viewer software under a 10X,  
661 0.45 NA objective (Keyence, Japan). Images for anti-HA & anti-GFP immunostaining, RNAscope, and  
662 *Oprm1<sup>Cre</sup>::Ai14* expression characterization were acquired with an FV3000 Confocal Laser Scanning Microscope  
663 with FV31S-SW software under a 20X, 0.75 NA or 40X, 0.95 NA UPLSAPO objective (Olympus, Japan). For  
664 comparison, images were processed with the same gain, offset, and exposure time.

665 **Statistical Analysis.** All data are shown as mean  $\pm$  SEM and analyzed using either a student's t-test, one-way  
666 ANOVA with Tukey's *post hoc* comparison, or two-way ANOVA with Bonferroni's *post hoc* comparison. All  
667 statistical analyses were performed with Prism 6 (GraphPad Software Inc., USA). ns  $p > 0.05$ , \*  $p < 0.05$ , \*\*  $p <$   
668 0.01, \*\*\*  $p < 0.001$ , \*\*\*\*  $p < 0.0001$ .

669 For a detailed list of resources, please refer to Supplementary Table 2.



670 **Supplementary Figures**

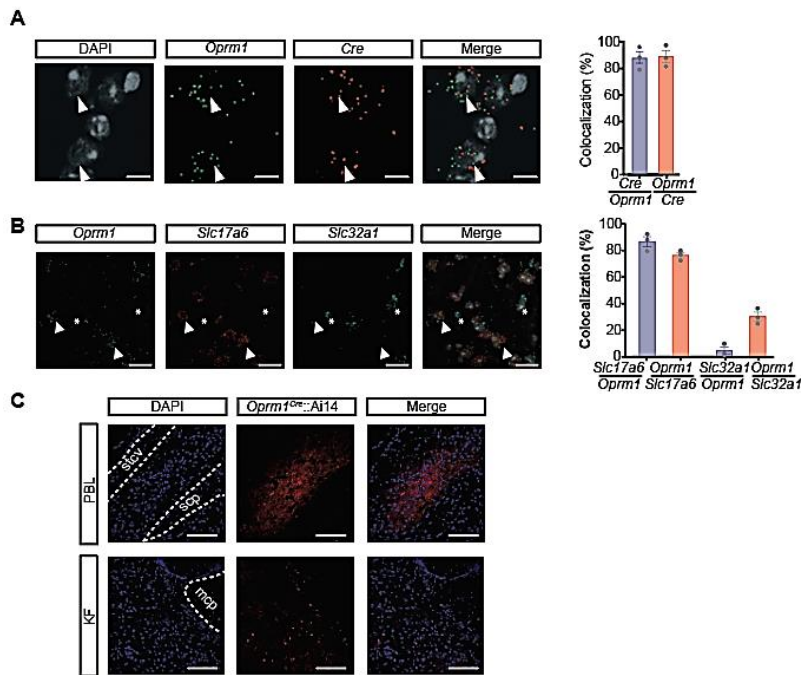

671

672 **Supplementary Figure 1.** Characterization of the *Oprm1<sup>Cre</sup>* mouse line and PBL<sup>*Oprm1*</sup> neurons. (A) RNA *in situ*  
 673 hybridization and quantification of the colocalization for *Oprm1* and *Cre* mRNAs in the PBL of *Oprm1<sup>Cre/+</sup>* mice  
 674 (n = 902 cells from 3 animals). Arrowheads, double-labeled cells. Scale bar, 10  $\mu$ m. (B) RNA *in situ* hybridization  
 675 and quantification of the colocalization for *Oprm1*, *Slc17a6* (encoding VGLUT2), and *Slc32a1* (encoding VGAT)  
 676 mRNAs in the PBL of wild type mice (n = 1552 and 1431 cells from 3 animals). Arrowheads, *Oprm1<sup>+</sup> / Slc17a6<sup>+</sup>*  
 677 cells; asterisks, *Oprm1<sup>-</sup> / Slc32a1<sup>+</sup>* cells. Scale bar, 50  $\mu$ m. (C) Example histology from *Oprm1<sup>Cre</sup>::Ai14* double  
 678 transgenic mice showing tdTomato expression in the PBL and KF under the same microscope settings. Anatomical  
 679 landmarks for PBL: stcv, ventral spinocerebellar tract; scp, superior cerebellar peduncle; mcp, middle cerebellar  
 680 peduncle. Scale bar, 200  $\mu$ m.

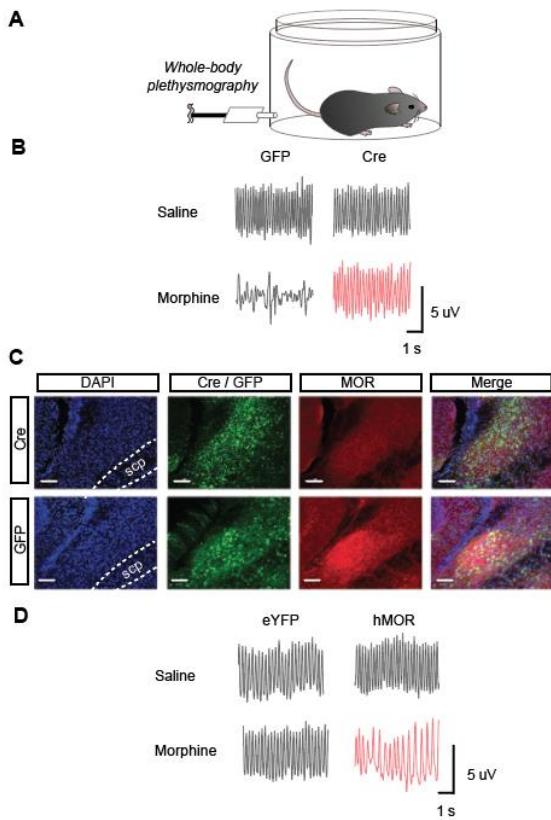

681

682 **Supplementary Figure 2.** MOR signaling in the PBL is indispensable for OIRD. (A) Whole-body  
683 plethysmography measured respiratory parameters before and after systemic injection of saline and morphine, after  
684 conditional ablation (B) and rescue (D) of the MOR signaling in the PBL. (B) Example plethysmograph after saline  
685 and morphine injections into the *Oprm1<sup>fl/fl</sup>* mice expressing AAV-GFP and AAV-Cre-GFP in the PBL. (C)  
686 Confirmation of MOR deletion by MOR immunohistochemistry after stereotaxic injection of AAV-Cre-GFP and  
687 control AAV-GFP into the PBL of the *Oprm1<sup>fl/fl</sup>* mice. Scale bar, 100  $\mu$ m. (D) Example plethysmograph after saline  
688 and morphine injections into the *Oprm1<sup>Cre/Cre</sup>* mice expressing AAV-DIO-eYFP and AAV-DIO-hMOR in the PBL.

689

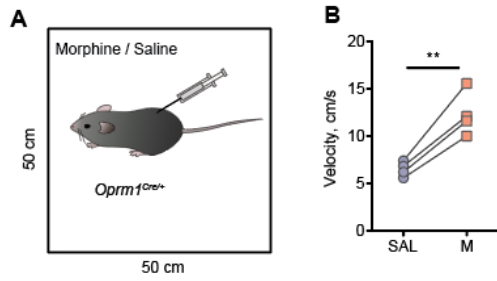

690

691 **Supplementary Figure 3.** Morphine effect on locomotor sensitization. (A) Locomotor activity of *Oprm1*<sup>Cre/+</sup> mice  
692 after morphine (40 mg/kg, i.p.) or saline injection was measured in the open field. (B) Systemic morphine injection  
693 increased locomotor activity in *Oprm1*<sup>Cre/+</sup> mice. Paired t-test, \*\*,  $p < 0.01$ .

694

695

696

697

698

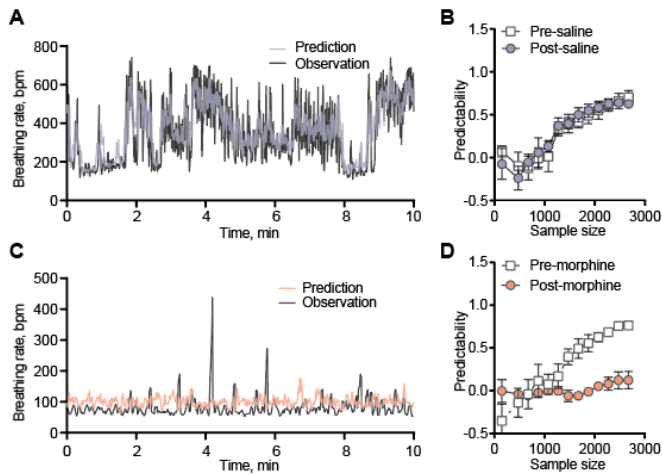

699

700 **Supplementary Figure 4.** Morphine eliminated the breathing predictor. Convergent cross-mapping (CCM)  
701 prediction of breathing rate using calcium activity as inputs before and after saline (0.9%, i.p., **A** and **B**) and  
702 morphine (40 mg/kg, i.p., **C** and **D**) injection. (**A**) After saline injection, the predicted and observed breathing rate  
703 traces followed closely with each other during the 10-min example. (**B**) Model predictability increased with the  
704 sample size before and after saline injection ( $n = 4$ ). (**C**) After morphine injection, the predicted and observed  
705 breathing rate traces no longer matched with each other. (**D**) Model predictability increased with the sample size  
706 before morphine injection, but the relationship was completely abolished after morphine injection ( $n = 4$ ).

707

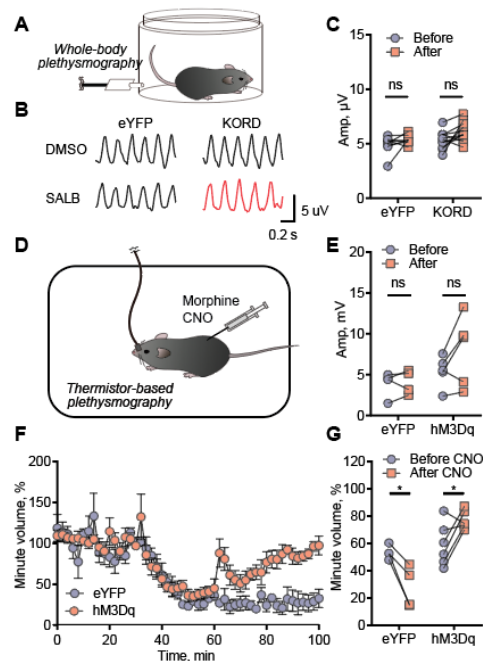

708

709 **Supplementary Figure 5.** (A) Whole-body plethysmography was used to measure respiratory parameters before  
 710 and after systemic injection of DMSO and SALB in the *Oprm1<sup>Cre/Cre</sup>* mice expressing AAV-DIO-eYFP and AAV-  
 711 DIO-KORD in PBL<sup>*Oprm1*</sup> neurons. (B) Example plethysmograph after DMSO and 7.5 mg/kg SALB injections in  
 712 eYFP and KORD groups. KORD-expressing animals displayed a slower respiratory rate after SALB injection  
 713 compared to other groups. (C) Respiratory amplitude was not significantly changed before and after SALB  
 714 injection, in both eYFP (n = 8) and KORD (n = 11)-expressing animals. Two-way ANOVA with Bonferroni's  
 715 multiple comparison post-hoc test, ns, not significant. (D) Thermistor-based plethysmography was used for  
 716 measuring respiration before and after systemic injection of 40 mg/kg morphine and CNO in the *Oprm1<sup>Cre/+</sup>* mice  
 717 expressing AAV-DIO-eYFP and AAV-DIO-hM3Dq in PBL<sup>*Oprm1*</sup> neurons. (E) Respiratory amplitude was not  
 718 significantly changed before and after CNO injection, in both eYFP (n = 5) and hM3Dq-expressing animals (n =  
 719 6). Although there was a trend of increase in the hM3Dq group, it failed to reach statistical significance. Two-way  
 720 ANOVA with Bonferroni's multiple comparison post-hoc tests, ns, not significant. (F) Activation of PBL<sup>*Oprm1*</sup>  
 721 neurons by injecting CNO (5 mg/kg, i.p.) in the hM3Dq-expressing group (n = 6) completely rescued the minute  
 722 volume to baseline level after morphine-induced respiratory depression, but not in eYFP-expressing group (n = 5).  
 723 (G) Quantitative analysis of F showing CNO injection significantly increased the minute volume in the hM3Dq-  
 724 expressing group (n = 6), whereas failed to rescue in the eYFP-expressing group (n = 5). Two-way ANOVA with  
 725 Bonferroni's multiple comparison post-hoc test. \*,  $p < 0.05$ .

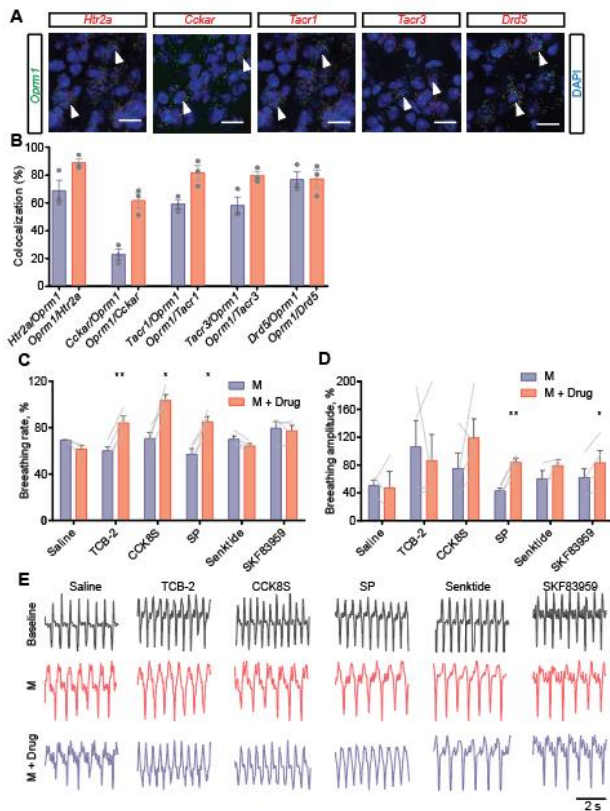

726

727 **Supplementary Figure 6.** Rescuing of OIRD by activating endogenous GPCRs expressed on PBL *Oprm1* neurons.  
 728 (A) RNA *in situ* hybridization confirms the co-expression of mRNA of *Oprm1* and five selected GPCRs, *Htr2a*,  
 729 *Cckar*, *Tacr1*, *Tacr3*, and *Drd5*, in the wild type mice. Arrowheads, double-labeled cells. Scale bar, 50  $\mu$ m. (B)  
 730 Quantification of RNA *in situ* hybridization showing the colocalization of *Oprm1* and selective GPCR genes in the  
 731 PBL of wild type mice (770, 539, 836, 657, 431 cells for *Htr2a*, *Cckar*, *Tacr1*, *Tacr3*, and *Drd5*, respectively). (C-  
 732 D) Normalized breathing rate (C) and amplitude (D) before morphine injection (Baseline), 30 minutes after  
 733 morphine injection (80 mg/kg, s.c., M), and 30 minutes after drug injection into the PBL (M + Drug), for all six  
 734 drugs tested. Large variations in amplitude are due to the technical limitations of the piezoelectric sensor since its  
 735 location is subjective to the slight movements of the animal's body. Paired t-test, \*,  $p < 0.05$ ; \*\*,  $p < 0.01$ . e Example  
 736 plethysmograph showing the breathing rhythm changes at each stage of the experiment. Note the decreased  
 737 breathing rate after morphine injection and increased breathing rate after TCB-2, CCK8S, and SP injections. The  
 738 exact shape of the plethysmograph varies due to the placement of the piezoelectric sensor.

739

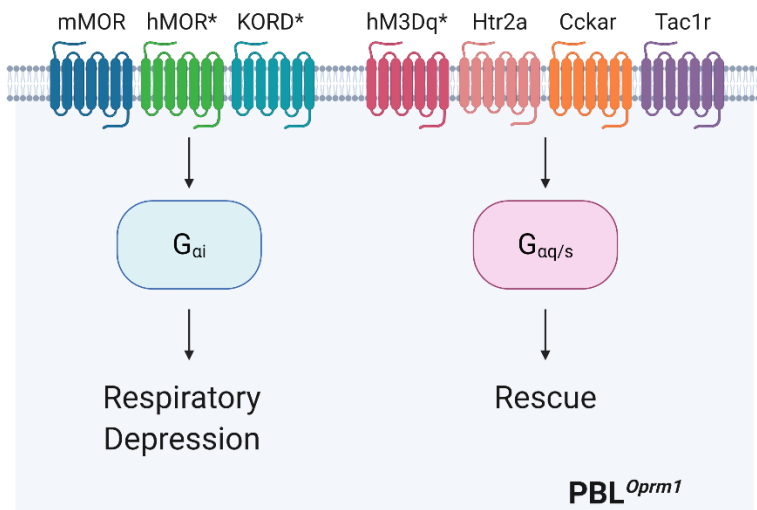

740

741 **Supplementary Figure 7.** Summary of the current study. *PBL<sup>Oprm1</sup>* neurons are critical players in OIRD  
742 pathogenesis and promising therapeutic targets for treating OIRD. In intact mice, inhibition of *PBL<sup>Oprm1</sup>*  
743 neurons through G<sub>i</sub>-coupled GPCRs via endogenous MOR (mMOR), human MOR (hMOR), and KOR-derived DREADD  
744 (KORD) leads to respiratory depression. In contrast, activation of these neurons via artificial (hM3Dq) or  
745 endogenous G<sub>q/s</sub>-coupled GPCRs (Htr2a, Cckar, Tac1r) rescues OIRD. Artificial GPCRs are marked with asterisks.  
746 Created with BioRender.com.

747

748

749

750

751

752

753

754

755

756

757 **Supplementary Table 1. List of pharmacological agents used in the current study.**

| Drug Name                         | Receptor (Gene)                     | Receptor Family | Concentration                                                                                                                                          | Solvent                         | Company               |
|-----------------------------------|-------------------------------------|-----------------|--------------------------------------------------------------------------------------------------------------------------------------------------------|---------------------------------|-----------------------|
| Naloxone                          | MOR ( <i>Oprm1</i> )                | Gi              | 0.4 mg/mL (i.c., intracranial)                                                                                                                         | 0.9% saline                     | Somerset Therapeutics |
| Morphine                          | MOR ( <i>Oprm1</i> )                | Gi              | 80 mg/kg (s.c., for anesthesia experiments);<br>10 mg/kg (i.p., for PBL-specific <i>Oprm1</i> knockout);<br>40 mg/kg (i.p., for all other experiments) | 0.9% saline                     | Spectrum Chemical     |
| Salvinorin B (SALB)               | KORD                                | Gi              | 7.5 mg/kg (i.p.)                                                                                                                                       | 0.9% saline containing 10% DMSO | Cayman Chemical       |
| Clozapine-N-oxide (CNO)           | hM3Dq                               | Gq              | 5 mg/kg (i.p.)                                                                                                                                         | 0.9% saline                     | Cayman Chemical       |
| TCB-2                             | 5-HT <sub>2A</sub> ( <i>Htr2a</i> ) | Gq              | 1 mg/mL (i.c.)                                                                                                                                         | 0.9% saline                     | Tocris Bioscience     |
| CCK Octapeptide, sulfated (CCK8S) | CCK <sub>1</sub> R ( <i>Cckar</i> ) | Gq              | 1 mg/mL (i.c.)                                                                                                                                         | 0.9% saline                     | Abcam                 |
| Substance P                       | NK <sub>1</sub> R ( <i>Tacr1</i> )  | Gq, Gs          | 1 mg/mL (i.c.)                                                                                                                                         | 0.9% saline                     | Cayman Chemical       |
| Senktide                          | NK <sub>3</sub> R ( <i>Tacr3</i> )  | Gq              | 1 mg/mL (i.c.)                                                                                                                                         | 0.9% saline                     | Cayman Chemical       |
| SKF-83959                         | D <sub>5</sub> R ( <i>Drd5</i> )    | Gs              | 1 mg/mL (i.c.)                                                                                                                                         | 0.9% saline containing 5% DMSO  | Tocris Bioscience     |

758

759 **Supplementary Table 2. Key Resources Table**



| Type            | Designation                                                  | Source or reference                 | Identifiers         |
|-----------------|--------------------------------------------------------------|-------------------------------------|---------------------|
| Mouse strains   | Oprm1-Cre:GFP                                                | Laboratory of Dr. Richard Palmiter  | N/A                 |
|                 | Wild type C57BL/6J                                           | Jackson Laboratory                  | Stock No.<br>000664 |
|                 | RiboTag <i>Rpl22<sup>HA/HA</sup></i>                         | Jackson Laboratory                  | Stock No.<br>011029 |
|                 | Ai14 <i>Gt(ROSA)26Sor<sup>tm14(CAG-tdTomato)Hze</sup></i>    | Jackson Laboratory                  | Stock No.<br>007914 |
| Virus           | AAVDJ-CAG-Cre-GFP                                            | Salk Institute Viral Vector Core    | N/A                 |
|                 | AAVDJ-CAG-GFP                                                | Salk Institute Viral Vector Core    | N/A                 |
|                 | AAV-hSyn-DIO-mCherry-T2A-FLAG-hOprm1                         | Laboratory of Dr. Matthew Banghart  | N/A                 |
|                 | AAV1-syn-FLEX-jGCaMP7s-WPRE                                  | Addgene                             | Addgene#<br>104491  |
|                 | AAVDJ-EF1a-DIO-hM3D(Gq)-mCherry                              | Salk Institute Viral Vector Core    | Addgene#<br>50460   |
|                 | AAV-DIO-KORD-mCitrine                                        | Laboratory of Dr. Richard Palmiter  | N/A                 |
|                 | AAV1-DIO-eYFP                                                | Laboratory of Dr. Richard Palmiter  | N/A                 |
| Antibodies      | Anti-hemagglutinin1.1, mouse (1:1000)                        | BioLegend                           | RRID<br>AB_2565335  |
|                 | Anti-GFP, chicken (1:1000)                                   | Aves Labs                           | RRID<br>AB_2307313  |
|                 | Anti-MOR, rabbit (1:1000)                                    | ImmunoStar                          | RRID<br>AB_572251   |
|                 | Alexa Fluor® 647-conjugated Donkey Anti-Mouse IgG (1:1000)   | Jackson ImmunoResearch Laboratories | RRID<br>AB_2340863  |
|                 | Alexa Fluor® 488-conjugated Donkey Anti-Chicken IgY (1:1000) | Jackson ImmunoResearch Laboratories | RRID<br>AB_2340375  |
|                 | Alexa Fluor® 647-conjugated Donkey Anti-Rabbit IgG (1:1000)  | Jackson ImmunoResearch Laboratories | RRID<br>AB_2492288  |
| RNAscope probes | Oprm1                                                        | Advanced Cell Diagnostics           | 315841              |
|                 | Htr2a                                                        | Advanced Cell Diagnostics           | 401291              |
|                 | Cckar                                                        | Advanced Cell Diagnostics           | 313751              |
|                 | Drd5                                                         | Advanced Cell Diagnostics           | 494411              |

|             |                               |                                                                                                           |                     |
|-------------|-------------------------------|-----------------------------------------------------------------------------------------------------------|---------------------|
|             | Tacr3                         | Advanced Cell Diagnostics                                                                                 | 481671              |
|             | Tacr1                         | Advanced Cell Diagnostics                                                                                 | 428781              |
|             | Cre                           | Advanced Cell Diagnostics                                                                                 | 402551              |
|             | Slc17a6                       | Advanced Cell Diagnostics                                                                                 | 319171              |
|             | Slc32a1                       | Advanced Cell Diagnostics                                                                                 | 319191              |
| Chemicals   | FluoSpheres 540/560 (10% v/v) | Thermo Fisher                                                                                             | Cat# F8809          |
|             | Cholera Toxin Subunit B-555   | Invitrogen                                                                                                | Cat# C34776         |
|             | Naloxone                      | Somerset Therapeutics                                                                                     | Cat#<br>70069007110 |
|             | Morphine                      | Spectrum Chemical                                                                                         | Cat# M1167          |
|             | TCB-2                         | Tocris Bioscience                                                                                         | Cat# 2592           |
|             | CCK Octapeptide, sulfated     | Abcam                                                                                                     | Cat# ab120209       |
|             | Substance P                   | Cayman Chemical                                                                                           | Cat# 24035          |
|             | Senktide                      | Cayman Chemical                                                                                           | Cat# 16721          |
|             | SKF-83959                     | Tocris Bioscience                                                                                         | Cat# 2074           |
|             | Clozapine N-oxide             | Cayman Chemical                                                                                           | Cat# 16882          |
|             | Salvinorin B                  | Cayman Chemical                                                                                           | Cat# 11488          |
|             | 2-methylbutane                | Fisher Chemical                                                                                           | Cat# O35514         |
| Software    | Doric Neuroscience Studio     | Doric Lenses                                                                                              | N/A                 |
|             | RStudio                       | RStudio                                                                                                   | Version<br>1.2.5001 |
|             | rEDM                          | <a href="https://cran.r-project.org/web/packages/rEDM/">https://cran.r-project.org/web/packages/rEDM/</a> | Version 0.7.2       |
|             | rEDM                          | <a href="https://ha0ye.github.io/rEDM/">https://ha0ye.github.io/rEDM/</a>                                 | Version 0.7.4       |
|             | LabChart                      | ADInstruments                                                                                             | Version 8           |
|             | BZ-X viewer                   | Keyence                                                                                                   | N/A                 |
|             | OlyVIA                        | Olympus Life Science                                                                                      | N/A                 |
|             | PRISM                         | GraphPad Software                                                                                         | Version 6           |
| Illustrator | Adobe                         | Version CS6<br>and CC2018                                                                                 |                     |
